# Supplementary material
Source: publisher figshare collection journal article supplement (https://acs.figshare.com/ndownloader/files/27538166)
Supplement: Supplementary file 1 [file 27538166]

## Sheet: Table S-5
Name	Abbreviation	SMILES	Formula	Structure	Monoisotopic mass	m/z	Adduct species	CCS [Å2]	SD	RSD	InChI	InChiKey	Spalte1
10:2 Fluorotelomer unsaturated carboxylate	10:2 FTUCA	C(=C(C(C(C(C(C(C(C(C(C(F)(F)F)(F)F)(F)F)(F)F)(F)F)(F)F)(F)F)(F)F)(F)F)F)C(=O)O	C12H2F20O2		557.974	556.966	[M-H]-	189.842	0.0424264	0.0223483	InChI=1S/C12H2F20O2/c13-2(1-3(33)34)4(14,15)5(16,17)6(18,19)7(20,21)8(22,23)9(24,25)10(26,27)11(28,29)12(30,31)32/h1H,(H,33,34)	OGNPKTMXAFCAFU-UHFFFAOYSA-N	PFAS
10:2 Fluorotelomer unsaturated carboxylate	10:2 FTUCA	C(=C(C(C(C(C(C(C(C(C(C(F)(F)F)(F)F)(F)F)(F)F)(F)F)(F)F)(F)F)(F)F)(F)F)F)C(=O)O	C12H2F20O2		557.974	1114.94	[2M-H]-	265.532	0.0785281	0.0295739	InChI=1S/C12H2F20O2/c13-2(1-3(33)34)4(14,15)5(16,17)6(18,19)7(20,21)8(22,23)9(24,25)10(26,27)11(28,29)12(30,31)32/h1H,(H,33,34)	OGNPKTMXAFCAFU-UHFFFAOYSA-N	PFAS
1H,1H,2H,2H-Perfluorododecanesulfonic acid	10:2 FTS	C(CS(=O)(=O)O)C(C(C(C(C(C(C(C(C(C(F)(F)F)(F)F)(F)F)(F)F)(F)F)(F)F)(F)F)(F)F)(F)F)(F)F	C12H5F21O3S		627.962	626.955	[M-H]-	204.212	0.030957	0.0151592	InChI=1S/C12H5F21O3S/c13-3(14,1-2-37(34,35)36)4(15,16)5(17,18)6(19,20)7(21,22)8(23,24)9(25,26)10(27,28)11(29,30)12(31,32)33/h1-2H2,(H,34,35,36)	AJMAYLFJZQYRHN-UHFFFAOYSA-N	PFAS
1H,1H,2H,2H-Perfluorododecanesulfonic acid	10:2 FTS	C(CS(=O)(=O)O)C(C(C(C(C(C(C(C(C(C(F)(F)F)(F)F)(F)F)(F)F)(F)F)(F)F)(F)F)(F)F)(F)F)(F)F	C12H5F21O3S		627.962	1254.92	[2M-H]-	288.718	0.0946925	0.0327976	InChI=1S/C12H5F21O3S/c13-3(14,1-2-37(34,35)36)4(15,16)5(17,18)6(19,20)7(21,22)8(23,24)9(25,26)10(27,28)11(29,30)12(31,32)33/h1-2H2,(H,34,35,36)	AJMAYLFJZQYRHN-UHFFFAOYSA-N	PFAS
2-(Methylthio)benzothiazole	2-MeSBTH	CSC1=NC2=CC=CC=C2S1	C8H7NS2		181.002	182.009	[M+H]+	131.316	0.0618466	0.0470975	InChI=1S/C8H7NS2/c1-10-8-9-6-4-2-3-5-7(6)11-8/h2-5H,1H3	UTBVIMLZIRIFFR-UHFFFAOYSA-N	Thiazoles
2,4-Di-(2-ethylhexyl) trimellitate	2,4-DEHTM	CCCCC(CC)COC(=O)c1ccc(C(=O)O)c(C(=O)OCC(CC)CCCC)c1	C25H38O6		434.267	435.274	[M+H]+	218.388	0.0687992	0.0315032	InChI=1S/C25H38O6/c1-5-9-11-18(7-3)16-30-24(28)20-13-14-21(23(26)27)22(15-20)25(29)31-17-19(8-4)12-10-6-2/h13-15,18-19H,5-12,16-17H2,1-4H3,(H,26,27)	WXSCEQXIHBEPIQ-UHFFFAOYSA-N	Plasticizer metabolites
2,4-Di-(2-ethylhexyl) trimellitate	2,4-DEHTM	CCCCC(CC)COC(=O)c1ccc(C(=O)O)c(C(=O)OCC(CC)CCCC)c1	C25H38O6		434.267	457.256	[M+Na]+	233.326	0.119583	0.0512513	InChI=1S/C25H38O6/c1-5-9-11-18(7-3)16-30-24(28)20-13-14-21(23(26)27)22(15-20)25(29)31-17-19(8-4)12-10-6-2/h13-15,18-19H,5-12,16-17H2,1-4H3,(H,26,27)	WXSCEQXIHBEPIQ-UHFFFAOYSA-N	Plasticizer metabolites
2,4-Di-(2-ethylhexyl) trimellitate	2,4-DEHTM	CCCCC(CC)COC(=O)c1ccc(C(=O)O)c(C(=O)OCC(CC)CCCC)c1	C25H38O6		434.267	433.26	[M-H]-	222.856	0.045	0.0201924	InChI=1S/C25H38O6/c1-5-9-11-18(7-3)16-30-24(28)20-13-14-21(23(26)27)22(15-20)25(29)31-17-19(8-4)12-10-6-2/h13-15,18-19H,5-12,16-17H2,1-4H3,(H,26,27)	WXSCEQXIHBEPIQ-UHFFFAOYSA-N	Plasticizer metabolites
2-Aminobenzothiazole	2NH2-BTH	C1=CC=C2C(=C1)N=C(S2)N	C7H6N2S		150.025	151.032	[M+H]+	128.598	0.025	0.0194404	InChI=1S/C7H6N2S/c8-7-9-5-3-1-2-4-6(5)10-7/h1-4H,(H2,8,9)	UHGULLIUJBCTEF-UHFFFAOYSA-N	Thiazoles
2-Aminobenzothiazole	2NH2-BTH	C1=CC=C2C(=C1)N=C(S2)N	C7H6N2S		150.025	149.018	[M-H]-	122.708	0.065345	0.053253	InChI=1S/C7H6N2S/c8-7-9-5-3-1-2-4-6(5)10-7/h1-4H,(H2,8,9)	UHGULLIUJBCTEF-UHFFFAOYSA-N	Thiazoles
2-Benzothiazolol	2-OH-BTH	C1=CC=C2C(=C1)NC(=O)S2	C7H5NOS		151.009	150.002	[M-H]-	123.754	0.0189297	0.0152962	InChI=1S/C7H5NOS/c9-7-8-5-3-1-2-4-6(5)10-7/h1-4H,(H,8,9)	YEDUAINPPJYDJZ-UHFFFAOYSA-N	Thiazoles
2-Ethylhexyl diphenyl phosphate	EHDPHP	CCCCC(CC)COP(=O)(OC1=CC=CC=C1)OC2=CC=CC=C2	C20H27O4P		362.165	385.154	[M+Na]+	202.698	0.0464579	0.0229197	InChI=1S/C20H27O4P/c1-3-5-12-18(4-2)17-22-25(21,23-19-13-8-6-9-14-19)24-20-15-10-7-11-16-20/h6-11,13-16,18H,3-5,12,17H2,1-2H3	CGSLYBDCEGBZCG-UHFFFAOYSA-N	organophosphorus flame retardant (OP)
2-Ethylhexyl diphenyl phosphate	EHDPHP	CCCCC(CC)COP(=O)(OC1=CC=CC=C1)OC2=CC=CC=C2	C20H27O4P		362.165	725.337	[2M+H]+	269.032	0.169017	0.062824	InChI=1S/C20H27O4P/c1-3-5-12-18(4-2)17-22-25(21,23-19-13-8-6-9-14-19)24-20-15-10-7-11-16-20/h6-11,13-16,18H,3-5,12,17H2,1-2H3	CGSLYBDCEGBZCG-UHFFFAOYSA-N	organophosphorus flame retardant (OP)
2-Ethylhexyl diphenyl phosphate	EHDPHP	CCCCC(CC)COP(=O)(OC1=CC=CC=C1)OC2=CC=CC=C2	C20H27O4P		362.165	747.319	[2M+Na]+	278.576	0.0761577	0.0273382	InChI=1S/C20H27O4P/c1-3-5-12-18(4-2)17-22-25(21,23-19-13-8-6-9-14-19)24-20-15-10-7-11-16-20/h6-11,13-16,18H,3-5,12,17H2,1-2H3	CGSLYBDCEGBZCG-UHFFFAOYSA-N	organophosphorus flame retardant (OP)
2-ethylhexyl phenyl phosphate	EHPHP	CCCCC(CC)COP(=O)(O)OC1=CC=CC=C1	C14H23O4P		286.133	309.123	[M+Na]+	183.406	0.280476	0.152926	InChI=1S/C14H23O4P/c1-3-5-9-13(4-2)12-17-19(15,16)18-14-10-7-6-8-11-14/h6-8,10-11,13H,3-5,9,12H2,1-2H3,(H,15,16)	UGIWGFXQNPWKPR-UHFFFAOYSA-N	OP metabolites
2-ethylhexyl phenyl phosphate	EHPHP	CCCCC(CC)COP(=O)(O)OC1=CC=CC=C1	C14H23O4P		286.133	573.274	[2M+H]+	240.742	0.0910586	0.0378241	InChI=1S/C14H23O4P/c1-3-5-9-13(4-2)12-17-19(15,16)18-14-10-7-6-8-11-14/h6-8,10-11,13H,3-5,9,12H2,1-2H3,(H,15,16)	UGIWGFXQNPWKPR-UHFFFAOYSA-N	OP metabolites
2-ethylhexyl phenyl phosphate	EHPHP	CCCCC(CC)COP(=O)(O)OC1=CC=CC=C1	C14H23O4P		286.133	285.126	[M-H]-	170.462	0.0288675	0.0169349	InChI=1S/C14H23O4P/c1-3-5-9-13(4-2)12-17-19(15,16)18-14-10-7-6-8-11-14/h6-8,10-11,13H,3-5,9,12H2,1-2H3,(H,15,16)	UGIWGFXQNPWKPR-UHFFFAOYSA-N	OP metabolites
2-ethylhexyl phenyl phosphate	EHPHP	CCCCC(CC)COP(=O)(O)OC1=CC=CC=C1	C14H23O4P		286.133	571.26	[2M-H]-	236.38	0.030957	0.0130963	InChI=1S/C14H23O4P/c1-3-5-9-13(4-2)12-17-19(15,16)18-14-10-7-6-8-11-14/h6-8,10-11,13H,3-5,9,12H2,1-2H3,(H,15,16)	UGIWGFXQNPWKPR-UHFFFAOYSA-N	OP metabolites
3,5,6-Trichloro-2-pyridinol	3,5,6-Trichloro-2-pyridinol	C1=C(C(=O)NC(=C1Cl)Cl)Cl	C5H2Cl3NO		196.92	197.927	[M+H]+	130.45	0.03937	0.0301802	InChI=1S/C5H2Cl3NO/c6-2-1-3(7)5(10)9-4(2)8/h1H,(H,9,10)	WCYYAQFQZQEUEN-UHFFFAOYSA-N	Other chemicals
3,5-ditert-butyl-4-hydroxybenzaldehyde		CC(C)(C)C1=CC(=CC(=C1O)C(C)(C)C)C=O	C15H22O2		234.162	235.169	[M+H]+	165.208	0.0403113	0.0244003	InChI=1S/C15H22O2/c1-14(2,3)11-7-10(9-16)8-12(13(11)17)15(4,5)6/h7-9,17H,1-6H3	DOZRDZLFLOODMB-UHFFFAOYSA-N	Other chemicals
3,5-ditert-butyl-4-hydroxybenzaldehyde		CC(C)(C)C1=CC(=CC(=C1O)C(C)(C)C)C=O	C15H22O2		234.162	257.151	[M+Na]+	185.314	0.102429	0.0552731	InChI=1S/C15H22O2/c1-14(2,3)11-7-10(9-16)8-12(13(11)17)15(4,5)6/h7-9,17H,1-6H3	DOZRDZLFLOODMB-UHFFFAOYSA-N	Other chemicals
3-Hydroxyphenyl diphenyl phosphate	3OH-TPHP	C1=CC=C(C=C1)OP(=O)(OC2=CC=CC=C2)OC3=CC=CC(=C3)O	C18H15O5P		342.066	343.073	[M+H]+	180.35	0.0141421	0.00784149	InChI=1S/C18H15O5P/c19-15-8-7-13-18(14-15)23-24(20,21-16-9-3-1-4-10-16)22-17-11-5-2-6-12-17/h1-14,19H	AWYVETCHVQGXMB-UHFFFAOYSA-N	OP metabolites
3-Hydroxyphenyl diphenyl phosphate	3OH-TPHP	C1=CC=C(C=C1)OP(=O)(OC2=CC=CC=C2)OC3=CC=CC(=C3)O	C18H15O5P		342.066	365.055	[M+Na]+	189.062	0.0718215	0.0379884	InChI=1S/C18H15O5P/c19-15-8-7-13-18(14-15)23-24(20,21-16-9-3-1-4-10-16)22-17-11-5-2-6-12-17/h1-14,19H	AWYVETCHVQGXMB-UHFFFAOYSA-N	OP metabolites
3-Hydroxyphenyl diphenyl phosphate	3OH-TPHP	C1=CC=C(C=C1)OP(=O)(OC2=CC=CC=C2)OC3=CC=CC(=C3)O	C18H15O5P		342.066	685.139	[2M+H]+	246.584	0.213846	0.0867233	InChI=1S/C18H15O5P/c19-15-8-7-13-18(14-15)23-24(20,21-16-9-3-1-4-10-16)22-17-11-5-2-6-12-17/h1-14,19H	AWYVETCHVQGXMB-UHFFFAOYSA-N	OP metabolites
3-Hydroxyphenyl diphenyl phosphate	3OH-TPHP	C1=CC=C(C=C1)OP(=O)(OC2=CC=CC=C2)OC3=CC=CC(=C3)O	C18H15O5P		342.066	707.121	[2M+Na]+	252.846	0.0932738	0.0368896	InChI=1S/C18H15O5P/c19-15-8-7-13-18(14-15)23-24(20,21-16-9-3-1-4-10-16)22-17-11-5-2-6-12-17/h1-14,19H	AWYVETCHVQGXMB-UHFFFAOYSA-N	OP metabolites
3-Hydroxyphenyl diphenyl phosphate	3OH-TPHP	C1=CC=C(C=C1)OP(=O)(OC2=CC=CC=C2)OC3=CC=CC(=C3)O	C18H15O5P		342.066	341.058	[M-H]-	180.46	0.101653	0.05633	InChI=1S/C18H15O5P/c19-15-8-7-13-18(14-15)23-24(20,21-16-9-3-1-4-10-16)22-17-11-5-2-6-12-17/h1-14,19H	AWYVETCHVQGXMB-UHFFFAOYSA-N	OP metabolites
3-Hydroxyphenyl diphenyl phosphate	3OH-TPHP	C1=CC=C(C=C1)OP(=O)(OC2=CC=CC=C2)OC3=CC=CC(=C3)O	C18H15O5P		342.066	683.124	[2M-H]-	241.965	0.051962	0.021475	InChI=1S/C18H15O5P/c19-15-8-7-13-18(14-15)23-24(20,21-16-9-3-1-4-10-16)22-17-11-5-2-6-12-17/h1-14,19H	AWYVETCHVQGXMB-UHFFFAOYSA-N	OP metabolites
3-Phenoxybenzoic acid	3-PBA	C1=CC=C(C=C1)OC2=CC=CC(=C2)C(=O)O	C13H10O3		214.063	213.056	[M-H]-	155.844	0.0699405	0.0448785	InChI=1S/C13H10O3/c14-13(15)10-5-4-8-12(9-10)16-11-6-2-1-3-7-11/h1-9H,(H,14,15)	NXTDJHZGHOFSQG-UHFFFAOYSA-N	Other chemicals
4-((4-(Benzyloxy)phenyl)sulfonyl)phenol	BPS-MAE	C=CCOC1=CC=C(C=C1)S(=O)(=O)C2=CC=C(C=C2)O	C15H14O4S		290.061	289.054	[M-H]-	172.68	0.0170783	0.00989012	InChI=1S/C15H14O4S/c1-2-11-19-13-5-9-15(10-6-13)20(17,18)14-7-3-12(16)4-8-14/h2-10,16H,1,11H2	FKZIDBGIZLBDDF-UHFFFAOYSA-N	Bisphenols
4-((4-Isopropoxyphenyl)sulfonyl)phenol	D-8	CC(C)OC1=CC=C(C=C1)S(=O)(=O)C2=CC=C(C=C2)O	C15H16O4S		292.077	291.07	[M-H]-	174.806	0.0170783	0.00976983	InChI=1S/C15H16O4S/c1-11(2)19-13-5-9-15(10-6-13)20(17,18)14-7-3-12(16)4-8-14/h3-11,16H,1-2H3	ZTILAOCGFRDHBH-UHFFFAOYSA-N	Bisphenols
4-((4-Isopropoxyphenyl)sulfonyl)phenol	D-8	CC(C)OC1=CC=C(C=C1)S(=O)(=O)C2=CC=C(C=C2)O	C15H16O4S		292.077	583.147	[2M-H]-	226.136	0.0759386	0.0335809	InChI=1S/C15H16O4S/c1-11(2)19-13-5-9-15(10-6-13)20(17,18)14-7-3-12(16)4-8-14/h3-11,16H,1-2H3	ZTILAOCGFRDHBH-UHFFFAOYSA-N	Bisphenols
4-(4-hydroxy-3-prop-2-enylphenyl)sulfonyl-2-prop-2-enylphenol	TGSA	C=CCC1=C(C=CC(=C1)S(=O)(=O)C2=CC(=C(C=C2)O)CC=C)O	C18H18O4S		330.093	329.085	[M-H]-	180.004	0.14975	0.0831925	InChI=1S/C18H18O4S/c1-3-5-13-11-15(7-9-17(13)19)23(21,22)16-8-10-18(20)14(12-16)6-4-2/h3-4,7-12,19-20H,1-2,5-6H2	MTMKZABGIQJAEX-UHFFFAOYSA-N	Bisphenols
4-(4-hydroxy-3-prop-2-enylphenyl)sulfonyl-2-prop-2-enylphenol	TGSA	C=CCC1=C(C=CC(=C1)S(=O)(=O)C2=CC(=C(C=C2)O)CC=C)O	C18H18O4S		330.093	659.178	[2M-H]-	240.988	0.0547723	0.0227282	InChI=1S/C18H18O4S/c1-3-5-13-11-15(7-9-17(13)19)23(21,22)16-8-10-18(20)14(12-16)6-4-2/h3-4,7-12,19-20H,1-2,5-6H2	MTMKZABGIQJAEX-UHFFFAOYSA-N	Bisphenols
4-Hydroxyphenyl phenyl phosphate	4OH-PhP	C1=CC=C(C=C1)OP(=O)(O)OC2=CC=C(C=C2)O	C12H11O5P		266.034	267.042	[M+H]+	162.442	0.0173205	0.0106626	InChI=1S/C12H11O5P/c13-10-6-8-12(9-7-10)17-18(14,15)16-11-4-2-1-3-5-11/h1-9,13H,(H,14,15)	TUBVQVOADJADLU-UHFFFAOYSA-N	OP metabolites
4-Hydroxyphenyl phenyl phosphate	4OH-PhP	C1=CC=C(C=C1)OP(=O)(O)OC2=CC=C(C=C2)O	C12H11O5P		266.034	289.024	[M+Na]+	169.016	0.110868	0.065596	InChI=1S/C12H11O5P/c13-10-6-8-12(9-7-10)17-18(14,15)16-11-4-2-1-3-5-11/h1-9,13H,(H,14,15)	TUBVQVOADJADLU-UHFFFAOYSA-N	OP metabolites
4-Hydroxyphenyl phenyl phosphate	4OH-PhP	C1=CC=C(C=C1)OP(=O)(O)OC2=CC=C(C=C2)O	C12H11O5P		266.034	265.027	[M-H]-	157.562	0.0660177	0.0418995	InChI=1S/C12H11O5P/c13-10-6-8-12(9-7-10)17-18(14,15)16-11-4-2-1-3-5-11/h1-9,13H,(H,14,15)	TUBVQVOADJADLU-UHFFFAOYSA-N	OP metabolites
4-Methylbenzotriazole	4-Me-BTR	CC1=CC=CC2=NNN=C12	C7H7N3		133.064	134.071	[M+H]+	126.786	0.0387298	0.0305474	InChI=1S/C7H7N3/c1-5-3-2-4-6-7(5)9-10-8-6/h2-4H,1H3,(H,8,9,10)	CMGDVUCDZOBDNL-UHFFFAOYSA-N	Triazoles
4-Methylbenzotriazole	4-Me-BTR	CC1=CC=CC2=NNN=C12	C7H7N3		133.064	132.057	[M-H]-	123.704	0.067676	0.054708	InChI=1S/C7H7N3/c1-5-3-2-4-6-7(5)9-10-8-6/h2-4H,1H3,(H,8,9,10)	CMGDVUCDZOBDNL-UHFFFAOYSA-N	Triazoles
4-n-Octylphenol		CCCCCCCCC1=CC=C(C=C1)O	C14H22O		206.167	205.16	[M-H]-	160.026	0.0377492	0.0235894	InChI=1S/C14H22O/c1-2-3-4-5-6-7-8-13-9-11-14(15)12-10-13/h9-12,15H,2-8H2,1H3	NTDQQZYCCIDJRK-UHFFFAOYSA-N	Other chemicals
4-Nonylphenol		CCCCCCCCCC1=CC=C(C=C1)O	C15H24O		220.183	219.175	[M-H]-	161.068	0.0734847	0.0456234	InChI=1S/C15H24O/c1-2-3-4-5-6-7-8-9-14-10-12-15(16)13-11-14/h10-13,16H,2-9H2,1H3	IGFHQQFPSIBGKE-UHFFFAOYSA-N	Other chemicals
4-t-Octylphenol		CC(C)(C)CC(C)(C)C1=CC=C(C=C1)O	C14H22O		206.167	205.16	[M-H]-	156.732	0.0387298	0.0247109	InChI=1S/C14H22O/c1-13(2,3)10-14(4,5)11-6-8-12(15)9-7-11/h6-9,15H,10H2,1-5H3	ISAVYTVYFVQUDY-UHFFFAOYSA-N	Other chemicals
5,6-Dimethylbenzotriazole	5,6-diMe-BTR	CC1=CC2=NNN=C2C=C1C	C8H9N3		147.08	148.087	[M+H]+	131.25	0.0191485	0.0145894	InChI=1S/C8H9N3/c1-5-3-7-8(4-6(5)2)10-11-9-7/h3-4H,1-2H3,(H,9,10,11)	MVPKIPGHRNIOPT-UHFFFAOYSA-N	Triazoles
5,6-Dimethylbenzotriazole	5,6-diMe-BTR	CC1=CC2=NNN=C2C=C1C	C8H9N3		147.08	146.072	[M-H]-	130.836	0.106442	0.081356	InChI=1S/C8H9N3/c1-5-3-7-8(4-6(5)2)10-11-9-7/h3-4H,1-2H3,(H,9,10,11)	MVPKIPGHRNIOPT-UHFFFAOYSA-N	Triazoles
5-Chlorobenzotriazole	5Cl-BTR	C1=CC2=NNN=C2C=C1Cl	C6H4ClN3		153.009	154.017	[M+H]+	131.884	0.0330404	0.0250526	InChI=1S/C6H4ClN3/c7-4-1-2-5-6(3-4)9-10-8-5/h1-3H,(H,8,9,10)	PZBQVZFITSVHAW-UHFFFAOYSA-N	Triazoles
5-Chlorobenzotriazole	5Cl-BTR	C1=CC2=NNN=C2C=C1Cl	C6H4ClN3		153.009	152.002	[M-H]-	122.488	0.037683	0.030765	InChI=1S/C6H4ClN3/c7-4-1-2-5-6(3-4)9-10-8-5/h1-3H,(H,8,9,10)	PZBQVZFITSVHAW-UHFFFAOYSA-N	Triazoles
5-Hydroxy-2-ethylhexyl diphenyl phosphate	5OH-EHDPHP	CC(O)CCC(CC)COP(=O)(Oc1ccccc1)Oc1ccccc1	C20H27O5P		378.16	379.167	[M+H]+	186.656	0.060553	0.032441	InChI=1S/C20H27O5P/c1-3-18(15-14-17(2)21)16-23-26(22,24-19-10-6-4-7-11-19)25-20-12-8-5-9-13-20/h4-13,17-18,21H,3,14-16H2,1-2H3	PZMFWNXABLTZRN-UHFFFAOYSA-N	OP metabolites
5-Hydroxy-2-ethylhexyl diphenyl phosphate	5OH-EHDPHP	CC(O)CCC(CC)COP(=O)(Oc1ccccc1)Oc1ccccc1	C20H27O5P		378.16	401.149	[M+Na]+	194.966	0.0556028	0.0285192	InChI=1S/C20H27O5P/c1-3-18(15-14-17(2)21)16-23-26(22,24-19-10-6-4-7-11-19)25-20-12-8-5-9-13-20/h4-13,17-18,21H,3,14-16H2,1-2H3	PZMFWNXABLTZRN-UHFFFAOYSA-N	OP metabolites
5-Hydroxy-2-ethylhexyl diphenyl phosphate	5OH-EHDPHP	CC(O)CCC(CC)COP(=O)(Oc1ccccc1)Oc1ccccc1	C20H27O5P		378.16	779.308	[2M+Na]+	268.396	0.0830161	0.0309304	InChI=1S/C20H27O5P/c1-3-18(15-14-17(2)21)16-23-26(22,24-19-10-6-4-7-11-19)25-20-12-8-5-9-13-20/h4-13,17-18,21H,3,14-16H2,1-2H3	PZMFWNXABLTZRN-UHFFFAOYSA-N	OP metabolites
5-methyl-1H-benzotriazole	5-Me-BTR	CC1=CC2=NNN=C2C=C1	C7H7N3		133.064	132.057	[M-H]-	124.636	0.015	0.012035	InChI=1S/C7H7N3/c1-5-2-3-6-7(4-5)9-10-8-6/h2-4H,1H3,(H,8,9,10)	LRUDIIUSNGCQKF-UHFFFAOYSA-N	Triazoles
6:2 chlorinated polyfluorinated ether sulfonate	F-53B	C(C(C(C(F)(F)Cl)(F)F)(F)F)(C(C(OC(C(F)(F)S(=O)(=O)O)(F)F)(F)F)(F)F)(F)F	C8HClF16O4S		531.903	531.903	[M-H]-	170.984	0.0129099	0.00755038	InChI=1S/C8HClF16O4S/c9-5(18,19)3(14,15)1(10,11)2(12,13)4(16,17)6(20,21)29-7(22,23)8(24,25)30(26,27)28/h(H,26,27,28)	GGOUUEMCWBTDMT-UHFFFAOYSA-N	PFAS
6-Chloroperfluorohexylphosphonic acid	Cl-PFHxPA	O=P(O)(O)C(F)(F)C(F)(F)C(F)(F)C(F)(F)C(F)(F)C(F)(F)Cl	C6H2ClF12O3P		415.924	414.917	[M-H]-	157.414	0.00816497	0.00518694	InChI=1S/C6H2ClF12O3P/c7-5(16,17)3(12,13)1(8,9)2(10,11)4(14,15)6(18,19)23(20,21)22/h(H2,20,21,22)	SSYJCIUXWUSGKG-UHFFFAOYSA-N	PFAS
6-Hydroxy Monopropylheptylphthalate	6OH-MPHP	CCCC(CCCC(C)O)COC(=O)C1=CC=CC=C1C(=O)O	C18H26O5		322.178	345.167	[M+Na]+	181.904	0.0727438	0.0399902	InChI=1S/C18H26O5/c1-3-7-14(9-6-8-13(2)19)12-23-18(22)16-11-5-4-10-15(16)17(20)21/h4-5,10-11,13-14,19H,3,6-9,12H2,1-2H3,(H,20,21)	KNDRVUYMYPIFIU-UHFFFAOYSA-N	Plasticizer metabolites
6-Hydroxy Monopropylheptylphthalate	6OH-MPHP	CCCC(CCCC(C)O)COC(=O)C1=CC=CC=C1C(=O)O	C18H26O5		322.178	321.171	[M-H]-	178.622	0.035	0.0195945	InChI=1S/C18H26O5/c1-3-7-14(9-6-8-13(2)19)12-23-18(22)16-11-5-4-10-15(16)17(20)21/h4-5,10-11,13-14,19H,3,6-9,12H2,1-2H3,(H,20,21)	KNDRVUYMYPIFIU-UHFFFAOYSA-N	Plasticizer metabolites
8:2 Fluorotelomer sulfonic acid	8:2 FTS	C(CS(=O)(=O)O)C(C(C(C(C(C(C(C(F)(F)F)(F)F)(F)F)(F)F)(F)F)(F)F)(F)F)(F)F	C10H5F17O3S		527.969	526.962	[M-H]-	186.394	0.0708872	0.0380309	InChI=1S/C10H5F17O3S/c11-3(12,1-2-31(28,29)30)4(13,14)5(15,16)6(17,18)7(19,20)8(21,22)9(23,24)10(25,26)27/h1-2H2,(H,28,29,30)	ALVYVCQIFHTIRD-UHFFFAOYSA-N	PFAS
8:2 Fluorotelomer sulfonic acid	8:2 FTS	C(CS(=O)(=O)O)C(C(C(C(C(C(C(C(F)(F)F)(F)F)(F)F)(F)F)(F)F)(F)F)(F)F)(F)F	C10H5F17O3S		527.969	1054.93	[2M-H]-	263.383	0.252389	0.0958259	InChI=1S/C10H5F17O3S/c11-3(12,1-2-31(28,29)30)4(13,14)5(15,16)6(17,18)7(19,20)8(21,22)9(23,24)10(25,26)27/h1-2H2,(H,28,29,30)	ALVYVCQIFHTIRD-UHFFFAOYSA-N	PFAS
8:2 Fluorotelomer unsaturated carboxylate	8:2 FTUCA	C(=C(C(C(C(C(C(C(C(F)(F)F)(F)F)(F)F)(F)F)(F)F)(F)F)(F)F)F)C(=O)O	C10H2F16O2		457.98	456.973	[M-H]-	172.632	0.0391578	0.0226828	InChI=1S/C10H2F16O2/c11-2(1-3(27)28)4(12,13)5(14,15)6(16,17)7(18,19)8(20,21)9(22,23)10(24,25)26/h1H,(H,27,28)/b2-1-	WHZXTVOEGZRRJM-UPHRSURJSA-N	PFAS
8:2 Fluorotelomer unsaturated carboxylate	8:2 FTUCA	C(=C(C(C(C(C(C(C(C(F)(F)F)(F)F)(F)F)(F)F)(F)F)(F)F)(F)F)F)C(=O)O	C10H2F16O2		457.98	914.953	[2M-H]-	239.964	0.0932291	0.0388513	InChI=1S/C10H2F16O2/c11-2(1-3(27)28)4(12,13)5(14,15)6(16,17)7(18,19)8(20,21)9(22,23)10(24,25)26/h1H,(H,27,28)/b2-1-	WHZXTVOEGZRRJM-UPHRSURJSA-N	PFAS
8-Chloroperfluorooctylphosponic acid	Cl-PFOPA	O=P(O)(O)C(F)(F)C(F)(F)C(F)(F)C(F)(F)C(F)(F)C(F)(F)C(F)(F)C(F)(F)Cl	C8H2ClF16O3P		515.917	514.91	[M-H]-	175.268	0.0141421	0.00806886	InChI=1S/C8H2ClF16O3P/c9-7(22,23)5(18,19)3(14,15)1(10,11)2(12,13)4(16,17)6(20,21)8(24,25)29(26,27)28/h(H2,26,27,28)	JTUDXWNBUPNSAX-UHFFFAOYSA-N	PFAS
Acetyltriethyl citrate	ATEC	CCOC(=O)CC(CC(=O)OCC)(C(=O)OCC)OC(=O)C	C14H22O8		318.131	341.121	[M+Na]+	174.36	0.0570088	0.032696	InChI=1S/C14H22O8/c1-5-19-11(16)8-14(22-10(4)15,13(18)21-7-3)9-12(17)20-6-2/h5-9H2,1-4H3	WEAPVABOECTMGR-UHFFFAOYSA-N	Plasticizers
Acetyltriethyl citrate	ATEC	CCOC(=O)CC(CC(=O)OCC)(C(=O)OCC)OC(=O)C	C14H22O8		318.131	659.252	[2M+Na]+	244.35	0.236432	0.0967595	InChI=1S/C14H22O8/c1-5-19-11(16)8-14(22-10(4)15,13(18)21-7-3)9-12(17)20-6-2/h5-9H2,1-4H3	WEAPVABOECTMGR-UHFFFAOYSA-N	Plasticizers
Antiblaze V6	V6	C(CCl)OP(=O)(OCCCl)OCC(COP(=O)(OCCCl)OCCCl)(CCl)CCl	C13H24Cl6O8P2		579.908	580.915	[M+H]+	211.374	0.0403113	0.0190711	InChI=1S/C13H24Cl6O8P2/c14-1-5-22-28(20,23-6-2-15)26-11-13(9-18,10-19)12-27-29(21,24-7-3-16)25-8-4-17/h1-12H2	ZGHUDSLVQAGWEY-UHFFFAOYSA-N	organophosphorus flame retardant (OP)
Antiblaze V6	V6	C(CCl)OP(=O)(OCCCl)OCC(COP(=O)(OCCCl)OCCCl)(CCl)CCl	C13H24Cl6O8P2		579.908	602.897	[M+Na]+	216.572	0.0813941	0.0375829	InChI=1S/C13H24Cl6O8P2/c14-1-5-22-28(20,23-6-2-15)26-11-13(9-18,10-19)12-27-29(21,24-7-3-16)25-8-4-17/h1-12H2	ZGHUDSLVQAGWEY-UHFFFAOYSA-N	organophosphorus flame retardant (OP)
Antiblaze V6	V6	C(CCl)OP(=O)(OCCCl)OCC(COP(=O)(OCCCl)OCCCl)(CCl)CCl	C13H24Cl6O8P2		579.908	1182.8	[2M+Na]+	304.652	0.158403	0.0519949	InChI=1S/C13H24Cl6O8P2/c14-1-5-22-28(20,23-6-2-15)26-11-13(9-18,10-19)12-27-29(21,24-7-3-16)25-8-4-17/h1-12H2	ZGHUDSLVQAGWEY-UHFFFAOYSA-N	organophosphorus flame retardant (OP)
Atrazine		CCNC1=NC(=NC(=N1)Cl)NC(C)C	C8H14ClN5		215.094	216.101	[M+H]+	149.526	0.0141421	0.00945798	InChI=1S/C8H14ClN5/c1-4-10-7-12-6(9)13-8(14-7)11-5(2)3/h5H,4H2,1-3H3,(H2,10,11,12,13,14)	MXWJVTOOROXGIU-UHFFFAOYSA-N	Other chemicals
benzothiazole	BTH	C1=CC=C2C(=C1)N=CS2	C7H5NS		135.014	158.003	[M+Na]+	134.7	0.364646	0.27071	InChI=1S/C7H5NS/c1-2-4-7-6(3-1)8-5-9-7/h1-5H	IOJUPLGTWVMSFF-UHFFFAOYSA-N	Thiazoles
Benzotriazole	BTR	C1=CC2=NNN=C2C=C1	C6H5N3		119.048	118.041	[M-H]-	118.296	0.025	0.0211334	InChI=1S/C6H5N3/c1-2-4-6-5(3-1)7-9-8-6/h1-4H,(H,7,8,9)	QRUDEWIWKLJBPS-UHFFFAOYSA-N	Triazoles
Benzotriazole	BTR	C1=CC2=NNN=C2C=C1	C6H5N3		119.048	120.056	[M+H]+	122.418	0.0326599	0.026679	InChI=1S/C6H5N3/c1-2-4-6-5(3-1)7-9-8-6/h1-4H,(H,7,8,9)	QRUDEWIWKLJBPS-UHFFFAOYSA-N	Triazoles
Bis (1H,1H,2H,2H-perflurodecyl) phosphate - 8:2 Fluorotelomer phosphate diester	8:2 diPAP	C(COP(=O)(O)OCCC(C(C(C(C(C(C(C(F)(F)F)(F)F)(F)F)(F)F)(F)F)(F)F)(F)F)(F)F)C(C(C(C(C(C(C(C(F)(F)F)(F)F)(F)F)(F)F)(F)F)(F)F)(F)F)(F)F	C20H9F34O4P		989.97	988.962	[M-H]-	261.614	0.0559762	0.0213965	InChI=1S/C20H9F34O4P/c21-5(22,7(25,26)9(29,30)11(33,34)13(37,38)15(41,42)17(45,46)19(49,50)51)1-3-57-59(55,56)58-4-2-6(23,24)8(27,28)10(31,32)12(35,36)14(39,40)16(43,44)18(47,48)20(52,53)54/h1-4H2,(H,55,56)	AFWOYEYXUDHGHF-UHFFFAOYSA-N	PFAS
bis(1,3-dichloro-2-propyl) phosphate	BDCIPP	C(C(CCl)OP(=O)(O)OC(CCl)CCl)Cl	C6H11Cl4O4P		317.915	318.922	[M+H]+	178.718	0.0408656	0.022866	InChI=1S/C6H11Cl4O4P/c7-1-5(2-8)13-15(11,12)14-6(3-9)4-10/h5-6H,1-4H2,(H,11,12)	NNKRUBFJSSBFSS-UHFFFAOYSA-N	OP metabolites
bis(1,3-dichloro-2-propyl) phosphate	BDCIPP	C(C(CCl)OP(=O)(O)OC(CCl)CCl)Cl	C6H11Cl4O4P		317.915	316.908	[M-H]-	157.705	0.01291	0.008186	InChI=1S/C6H11Cl4O4P/c7-1-5(2-8)13-15(11,12)14-6(3-9)4-10/h5-6H,1-4H2,(H,11,12)	NNKRUBFJSSBFSS-UHFFFAOYSA-N	OP metabolites
bis(1,3-dichloro-2-propyl) phosphate	BDCIPP	C(C(CCl)OP(=O)(O)OC(CCl)CCl)Cl	C6H11Cl4O4P		317.915	634.823	[2M-H]-	220.13	0.102307	0.046476	InChI=1S/C6H11Cl4O4P/c7-1-5(2-8)13-15(11,12)14-6(3-9)4-10/h5-6H,1-4H2,(H,11,12)	NNKRUBFJSSBFSS-UHFFFAOYSA-N	OP metabolites
bis(1-chloro-2-propyl) 1-hydroxy-2-propyl phosphate	BCIPHIPP	CC(CO)OP(=O)(OC(C)CCl)OC(C)CCl	C9H19Cl2O5P		308.035	309.042	[M+H]+	160.612	0.0334664	0.0208368	InChI=1S/C9H19Cl2O5P/c1-7(4-10)14-17(13,15-8(2)5-11)16-9(3)6-12/h7-9,12H,4-6H2,1-3H3	AUUWEOBTRZWTTC-UHFFFAOYSA-N	OP metabolites
bis(1-chloro-2-propyl) 1-hydroxy-2-propyl phosphate	BCIPHIPP	CC(CO)OP(=O)(OC(C)CCl)OC(C)CCl	C9H19Cl2O5P		308.035	331.024	[M+Na]+	168.894	0.0336155	0.0199033	InChI=1S/C9H19Cl2O5P/c1-7(4-10)14-17(13,15-8(2)5-11)16-9(3)6-12/h7-9,12H,4-6H2,1-3H3	AUUWEOBTRZWTTC-UHFFFAOYSA-N	OP metabolites
bis(2-butoxyethyl) 2-hydroxyethyl phosphate	BBOEHEP	CCCCOCCOP(=O)(OCCO)OCCOCCCC	C14H31O7P		342.181	343.188	[M+H]+	179.266	0.0129099	0.00720156	InChI=1S/C14H31O7P/c1-3-5-8-17-11-13-20-22(16,19-10-7-15)21-14-12-18-9-6-4-2/h15H,3-14H2,1-2H3	UQSRKBXTCXVEJL-UHFFFAOYSA-N	OP metabolites
bis(2-butoxyethyl) 2-hydroxyethyl phosphate	BBOEHEP	CCCCOCCOP(=O)(OCCO)OCCOCCCC	C14H31O7P		342.181	365.17	[M+Na]+	182.294	0.0330404	0.0181248	InChI=1S/C14H31O7P/c1-3-5-8-17-11-13-20-22(16,19-10-7-15)21-14-12-18-9-6-4-2/h15H,3-14H2,1-2H3	UQSRKBXTCXVEJL-UHFFFAOYSA-N	OP metabolites
bis(2-butoxyethyl) 2-hydroxyethyl phosphate	BBOEHEP	CCCCOCCOP(=O)(OCCO)OCCOCCCC	C14H31O7P		342.181	707.351	[2M+Na]+	259.024	0.0804156	0.0310456	InChI=1S/C14H31O7P/c1-3-5-8-17-11-13-20-22(16,19-10-7-15)21-14-12-18-9-6-4-2/h15H,3-14H2,1-2H3	UQSRKBXTCXVEJL-UHFFFAOYSA-N	OP metabolites
Bis(2-butoxyethyl) 3′-hydroxy-2-butoxyethyl phosphate	3OH-TBOEP	CCCCOCCOP(=O)(OCCOCCCC)OCCOCCC(C)O	C18H39O8P		414.238	415.246	[M+H]+	195.446	0.0403113	0.0206253	InChI=1S/C18H39O8P/c1-4-6-9-21-12-15-24-27(20,25-16-13-22-10-7-5-2)26-17-14-23-11-8-18(3)19/h18-19H,4-17H2,1-3H3	ZYWDPVGRFHQPGL-UHFFFAOYSA-N	OP metabolites
Bis(2-butoxyethyl) 3′-hydroxy-2-butoxyethyl phosphate	3OH-TBOEP	CCCCOCCOP(=O)(OCCOCCCC)OCCOCCC(C)O	C18H39O8P		414.238	437.228	[M+Na]+	200.382	0.0469042	0.0234074	InChI=1S/C18H39O8P/c1-4-6-9-21-12-15-24-27(20,25-16-13-22-10-7-5-2)26-17-14-23-11-8-18(3)19/h18-19H,4-17H2,1-3H3	ZYWDPVGRFHQPGL-UHFFFAOYSA-N	OP metabolites
Bis(2-butoxyethyl) 3′-hydroxy-2-butoxyethyl phosphate	3OH-TBOEP	CCCCOCCOP(=O)(OCCOCCCC)OCCOCCC(C)O	C18H39O8P		414.238	851.466	[2M+Na]+	286.242	0.0974252	0.034036	InChI=1S/C18H39O8P/c1-4-6-9-21-12-15-24-27(20,25-16-13-22-10-7-5-2)26-17-14-23-11-8-18(3)19/h18-19H,4-17H2,1-3H3	ZYWDPVGRFHQPGL-UHFFFAOYSA-N	OP metabolites
Bis(2-butoxyethyl) hydrogen phosphate	BBOEP	CCCCOCCOP(=O)(O)OCCOCCCC	C12H27O6P		298.154	299.162	[M+H]+	171.774	0.0391152	0.0227713	InChI=1S/C12H27O6P/c1-3-5-7-15-9-11-17-19(13,14)18-12-10-16-8-6-4-2/h3-12H2,1-2H3,(H,13,14)	NNXWIPHZHATIFE-UHFFFAOYSA-N	OP metabolites
Bis(2-butoxyethyl) hydrogen phosphate	BBOEP	CCCCOCCOP(=O)(O)OCCOCCCC	C12H27O6P		298.154	321.144	[M+Na]+	175.662	0.0363318	0.0206828	InChI=1S/C12H27O6P/c1-3-5-7-15-9-11-17-19(13,14)18-12-10-16-8-6-4-2/h3-12H2,1-2H3,(H,13,14)	NNXWIPHZHATIFE-UHFFFAOYSA-N	OP metabolites
Bis(2-butoxyethyl) hydrogen phosphate	BBOEP	CCCCOCCOP(=O)(O)OCCOCCCC	C12H27O6P		298.154	297.147	[M-H]-	175.917	0.020616	0.011719	InChI=1S/C12H27O6P/c1-3-5-7-15-9-11-17-19(13,14)18-12-10-16-8-6-4-2/h3-12H2,1-2H3,(H,13,14)	NNXWIPHZHATIFE-UHFFFAOYSA-N	OP metabolites
Bis(2-chloroethyl) phosphate	BCEP	C(CCl)OP(=O)(O)OCCCl	C4H9Cl2O4P		221.962	222.969	[M+H]+	138.082	0.0822091	0.0595364	InChI=1S/C4H9Cl2O4P/c5-1-3-9-11(7,8)10-4-2-6/h1-4H2,(H,7,8)	PMGHIGLOERPWGC-UHFFFAOYSA-N	OP metabolites
Bis(2-chloroethyl) phosphate	BCEP	C(CCl)OP(=O)(O)OCCCl	C4H9Cl2O4P		221.962	244.951	[M+Na]+	149.038	0.0930949	0.0624639	InChI=1S/C4H9Cl2O4P/c5-1-3-9-11(7,8)10-4-2-6/h1-4H2,(H,7,8)	PMGHIGLOERPWGC-UHFFFAOYSA-N	OP metabolites
Bis(2-chloroethyl) phosphate	BCEP	C(CCl)OP(=O)(O)OCCCl	C4H9Cl2O4P		221.962	442.916	[2M-H]-	189.116	0.138311	0.073136	InChI=1S/C4H9Cl2O4P/c5-1-3-9-11(7,8)10-4-2-6/h1-4H2,(H,7,8)	PMGHIGLOERPWGC-UHFFFAOYSA-N	OP metabolites
bis(2-chloropropyl) hydrogen phosphate	BCIPP	CC(COP(=O)(O)OCC(C)Cl)Cl	C6H13Cl2O4P		249.993	272.982	[M+Na]+	156.446	0.0207364	0.0132547	InChI=1S/C6H13Cl2O4P/c1-5(7)3-11-13(9,10)12-4-6(2)8/h5-6H,3-4H2,1-2H3,(H,9,10)	UXEXPVAWQLGFAP-UHFFFAOYSA-N	OP metabolites
bis(2-chloropropyl) hydrogen phosphate	BCIPP	CC(COP(=O)(O)OCC(C)Cl)Cl	C6H13Cl2O4P		249.993	498.978	[2M-H]-	203.44	0.10583	0.05202	InChI=1S/C6H13Cl2O4P/c1-5(7)3-11-13(9,10)12-4-6(2)8/h5-6H,3-4H2,1-2H3,(H,9,10)	UXEXPVAWQLGFAP-UHFFFAOYSA-N	OP metabolites
Bis(3,5,5-trimethylhexyl)phosphate		CC(CCOP(=O)(O)OCCC(C)CC(C)(C)C)CC(C)(C)C	C18H39O4P		350.259	351.266	[M+H]+	202.092	0.0506623	0.0250689	InChI=1S/C18H39O4P/c1-15(13-17(3,4)5)9-11-21-23(19,20)22-12-10-16(2)14-18(6,7)8/h15-16H,9-14H2,1-8H3,(H,19,20)	LPOAIFBVIQAMFA-UHFFFAOYSA-N	organophosphorus flame retardant (OP)
Bis(3,5,5-trimethylhexyl)phosphate		CC(CCOP(=O)(O)OCCC(C)CC(C)(C)C)CC(C)(C)C	C18H39O4P		350.259	373.248	[M+Na]+	210.406	0.0865544	0.0411369	InChI=1S/C18H39O4P/c1-15(13-17(3,4)5)9-11-21-23(19,20)22-12-10-16(2)14-18(6,7)8/h15-16H,9-14H2,1-8H3,(H,19,20)	LPOAIFBVIQAMFA-UHFFFAOYSA-N	organophosphorus flame retardant (OP)
Bisphenol A	BPA	CC(C)(C1=CC=C(C=C1)O)C2=CC=C(C=C2)O	C15H16O2		228.115	227.108	[M-H]-	163.504	0.0141421	0.00864941	InChI=1S/C15H16O2/c1-15(2,11-3-7-13(16)8-4-11)12-5-9-14(17)10-6-12/h3-10,16-17H,1-2H3	IISBACLAFKSPIT-UHFFFAOYSA-N	Bisphenols
Bisphenol A bis(diphenyl phosphate)	Fyrolflex BDP	CC(C)(C1=CC=C(C=C1)OP(=O)(OC2=CC=CC=C2)OC3=CC=CC=C3)C4=CC=C(C=C4)OP(=O)(OC5=CC=CC=C5)OC6=CC=CC=C6	C39H34O8P2		692.173	693.18	[M+H]+	246.334	0.15678	0.0636453	InChI=1S/C39H34O8P2/c1-39(2,31-23-27-37(28-24-31)46-48(40,42-33-15-7-3-8-16-33)43-34-17-9-4-10-18-34)32-25-29-38(30-26-32)47-49(41,44-35-19-11-5-12-20-35)45-36-21-13-6-14-22-36/h3-30H,1-2H3	BQPNUOYXSVUVMY-UHFFFAOYSA-N	organophosphorus flame retardant (OP)
Bisphenol A bis(diphenyl phosphate)	Fyrolflex BDP	CC(C)(C1=CC=C(C=C1)OP(=O)(OC2=CC=CC=C2)OC3=CC=CC=C3)C4=CC=C(C=C4)OP(=O)(OC5=CC=CC=C5)OC6=CC=CC=C6	C39H34O8P2		692.173	715.162	[M+Na]+	256.612	0.120291	0.0468767	InChI=1S/C39H34O8P2/c1-39(2,31-23-27-37(28-24-31)46-48(40,42-33-15-7-3-8-16-33)43-34-17-9-4-10-18-34)32-25-29-38(30-26-32)47-49(41,44-35-19-11-5-12-20-35)45-36-21-13-6-14-22-36/h3-30H,1-2H3	BQPNUOYXSVUVMY-UHFFFAOYSA-N	organophosphorus flame retardant (OP)
Bisphenol AF	BPAF	C1=CC(=CC=C1C(C2=CC=C(C=C2)O)(C(F)(F)F)C(F)(F)F)O	C15H10F6O2		336.058	335.051	[M-H]-	166.058	0.0340343	0.0204954	InChI=1S/C15H10F6O2/c16-14(17,18)13(15(19,20)21,9-1-5-11(22)6-2-9)10-3-7-12(23)8-4-10/h1-8,22-23H	ZFVMWEVVKGLCIJ-UHFFFAOYSA-N	Bisphenols
Bisphenol AF	BPAF	C1=CC(=CC=C1C(C2=CC=C(C=C2)O)(C(F)(F)F)C(F)(F)F)O	C15H10F6O2		336.058	671.11	[2M-H]-	230.13	0.0925563	0.0402191	InChI=1S/C15H10F6O2/c16-14(17,18)13(15(19,20)21,9-1-5-11(22)6-2-9)10-3-7-12(23)8-4-10/h1-8,22-23H	ZFVMWEVVKGLCIJ-UHFFFAOYSA-N	Bisphenols
Bisphenol AP	BPAP	CC(C1=CC=CC=C1)(C2=CC=C(C=C2)O)C3=CC=C(C=C3)O	C20H18O2		290.131	289.123	[M-H]-	179.946	0.043589	0.0242234	InChI=1S/C20H18O2/c1-20(15-5-3-2-4-6-15,16-7-11-18(21)12-8-16)17-9-13-19(22)14-10-17/h2-14,21-22H,1H3	VOWWYDCFAISREI-UHFFFAOYSA-N	Bisphenols
Bisphenol B	BPB	CCC(C)(C1=CC=C(C=C1)O)C2=CC=C(C=C2)O	C16H18O2		242.131	241.123	[M-H]-	167.17	0.05058	0.0302566	InChI=1S/C16H18O2/c1-3-16(2,12-4-8-14(17)9-5-12)13-6-10-15(18)11-7-13/h4-11,17-18H,3H2,1-2H3	HTVITOHKHWFJKO-UHFFFAOYSA-N	Bisphenols
Bisphenol C	BPC	C1=CC(=CC=C1C(=C(Cl)Cl)C2=CC=C(C=C2)O)O	C14H10Cl2O2		280.006	278.999	[M-H]-	165.302	0.0408248	0.0246971	InChI=1S/C14H10Cl2O2/c15-14(16)13(9-1-5-11(17)6-2-9)10-3-7-12(18)8-4-10/h1-8,17-18H	OWEYKIWAZBBXJK-UHFFFAOYSA-N	Bisphenols
Bisphenol F	BPF	C1=CC(=CC=C1CC2=CC=C(C=C2)O)O	C13H12O2		200.084	199.076	[M-H]-	155.052	0.05	0.0322472	InChI=1S/C13H12O2/c14-12-5-1-10(2-6-12)9-11-3-7-13(15)8-4-11/h1-8,14-15H,9H2	PXKLMJQFEQBVLD-UHFFFAOYSA-N	Bisphenols
Bisphenol P	BPP	CC(C)(C1=CC=C(C=C1)C(C)(C)C2=CC=C(C=C2)O)C3=CC=C(C=C3)O	C24H26O2		346.193	345.186	[M-H]-	180.64	0.0251661	0.0139316	InChI=1S/C24H26O2/c1-23(2,19-9-13-21(25)14-10-19)17-5-7-18(8-6-17)24(3,4)20-11-15-22(26)16-12-20/h5-16,25-26H,1-4H3	GIXXQTYGFOHYPT-UHFFFAOYSA-N	Bisphenols
Bisphenol S	BPS	C1=CC(=CC=C1O)S(=O)(=O)C2=CC=C(C=C2)O	C12H10O4S		250.03	249.023	[M-H]-	155.488	0.0310913	0.0199959	InChI=1S/C12H10O4S/c13-9-1-5-11(6-2-9)17(15,16)12-7-3-10(14)4-8-12/h1-8,13-14H	VPWNQTHUCYMVMZ-UHFFFAOYSA-N	Bisphenols
Bisphenol S	BPS	C1=CC(=CC=C1O)S(=O)(=O)C2=CC=C(C=C2)O	C12H10O4S		250.03	499.053	[2M-H]-	202.352	0.0518813	0.0256391	InChI=1S/C12H10O4S/c13-9-1-5-11(6-2-9)17(15,16)12-7-3-10(14)4-8-12/h1-8,13-14H	VPWNQTHUCYMVMZ-UHFFFAOYSA-N	Bisphenols
Bisphenol Z	BPZ	C1CCC(CC1)(C2=CC=C(C=C2)O)C3=CC=C(C=C3)O	C18H20O2		268.146	267.139	[M-H]-	174.21	0.0316228	0.0181521	InChI=1S/C18H20O2/c19-16-8-4-14(5-9-16)18(12-2-1-3-13-18)15-6-10-17(20)11-7-15/h4-11,19-20H,1-3,12-13H2	SDDLEVPIDBLVHC-UHFFFAOYSA-N	Bisphenols
Butyryl trihexyl citrate	BTHC	CCCCCCOC(=O)CC(CC(=O)OCCCCCC)(C(=O)OCCCCCC)OC(=O)CCC	C28H50O8		514.351	515.358	[M+H]+	240.446	0.177989	0.0740244	InChI=1S/C28H50O8/c1-5-9-12-15-19-33-25(30)22-28(36-24(29)18-8-4,27(32)35-21-17-14-11-7-3)23-26(31)34-20-16-13-10-6-2/h5-23H2,1-4H3	GWVUTNGDMGTPFE-UHFFFAOYSA-N	Plasticizers
Butyryl trihexyl citrate	BTHC	CCCCCCOC(=O)CC(CC(=O)OCCCCCC)(C(=O)OCCCCCC)OC(=O)CCC	C28H50O8		514.351	537.34	[M+Na]+	245.248	0.0657267	0.0268001	InChI=1S/C28H50O8/c1-5-9-12-15-19-33-25(30)22-28(36-24(29)18-8-4,27(32)35-21-17-14-11-7-3)23-26(31)34-20-16-13-10-6-2/h5-23H2,1-4H3	GWVUTNGDMGTPFE-UHFFFAOYSA-N	Plasticizers
Butyryl trihexyl citrate	BTHC	CCCCCCOC(=O)CC(CC(=O)OCCCCCC)(C(=O)OCCCCCC)OC(=O)CCC	C28H50O8		514.351	1051.69	[2M+Na]+	348.018	0.200923	0.0577335	InChI=1S/C28H50O8/c1-5-9-12-15-19-33-25(30)22-28(36-24(29)18-8-4,27(32)35-21-17-14-11-7-3)23-26(31)34-20-16-13-10-6-2/h5-23H2,1-4H3	GWVUTNGDMGTPFE-UHFFFAOYSA-N	Plasticizers
Cyclohexane-1,2-dicarboxylic mono carboxyisooctyl ester	cis-cx-MINCH	CC(CCCOC(=O)[C@@H]1CCCC[C@@H]1C(=O)O)CCCC(=O)O	C17H28O6		328.189	351.178	[M+Na]+	179.932	0.0556776	0.0309437	InChI=1S/C17H28O6/c1-12(6-4-10-15(18)19)7-5-11-23-17(22)14-9-3-2-8-13(14)16(20)21/h12-14H,2-11H2,1H3,(H,18,19)(H,20,21)/t12?,13-,14+/m0/s1	HGYNPCSGHWFMTB-KFTPUPIBSA-N	Plasticizer metabolites
Cyclohexane-1,2-dicarboxylic mono carboxyisooctyl ester	cis-cx-MINCH	CC(CCCOC(=O)[C@@H]1CCCC[C@@H]1C(=O)O)CCCC(=O)O	C17H28O6		328.189	327.181	[M-H]-	176.734	0.0216025	0.0122232	InChI=1S/C17H28O6/c1-12(6-4-10-15(18)19)7-5-11-23-17(22)14-9-3-2-8-13(14)16(20)21/h12-14H,2-11H2,1H3,(H,18,19)(H,20,21)/t12?,13-,14+/m0/s1	HGYNPCSGHWFMTB-KFTPUPIBSA-N	Plasticizer metabolites
Cyclohexane-1,2-dicarboxylic mono hydroxyisononyl ester	cis-OH-MINCH	CC(O)CCC(C)CCCOC(=O)[C@@H]1CCCC[C@@H]1C(=O)O	C17H30O5		314.209	337.199	[M+Na]+	178.574	0.0818026	0.0458088	InChI=1S/C17H30O5/c1-12(9-10-13(2)18)6-5-11-22-17(21)15-8-4-3-7-14(15)16(19)20/h12-15,18H,3-11H2,1-2H3,(H,19,20)/t12?,13?,14-,15+/m0/s1	WPTRTTWYMWWUTQ-PFSRBDOWSA-N	Plasticizer metabolites
Cyclohexane-1,2-dicarboxylic mono hydroxyisononyl ester	cis-OH-MINCH	CC(O)CCC(C)CCCOC(=O)[C@@H]1CCCC[C@@H]1C(=O)O	C17H30O5		314.209	313.202	[M-H]-	175.322	0.0236291	0.0134775	InChI=1S/C17H30O5/c1-12(9-10-13(2)18)6-5-11-22-17(21)15-8-4-3-7-14(15)16(19)20/h12-15,18H,3-11H2,1-2H3,(H,19,20)/t12?,13?,14-,15+/m0/s1	WPTRTTWYMWWUTQ-PFSRBDOWSA-N	Plasticizer metabolites
Di(2-ethylhexyl) adipate	DEHA	CCCCC(CC)COC(=O)CCCCC(=O)OCC(CC)CCCC	C22H42O4		370.308	371.316	[M+H]+	209.384	0.0258199	0.0123314	InChI=1S/C22H42O4/c1-5-9-13-19(7-3)17-25-21(23)15-11-12-16-22(24)26-18-20(8-4)14-10-6-2/h19-20H,5-18H2,1-4H3	SAOKZLXYCUGLFA-UHFFFAOYSA-N	Plasticizers
Di(2-ethylhexyl) adipate	DEHA	CCCCC(CC)COC(=O)CCCCC(=O)OCC(CC)CCCC	C22H42O4		370.308	393.298	[M+Na]+	218.456	0.0716473	0.0327971	InChI=1S/C14H26O4/c1-11(2)9-17-13(15)7-5-6-8-14(16)18-10-12(3)4/h11-12H,5-10H2,1-4H3	RDOFJDLLWVCMRU-UHFFFAOYSA-N	Plasticizers
Di(2-ethylhexyl) adipate	DEHA	CCCCC(CC)COC(=O)CCCCC(=O)OCC(CC)CCCC	C22H42O4		370.308	763.606	[2M+Na]+	294.67	0.0258199	0.00876231	InChI=1S/C14H26O4/c1-11(2)9-17-13(15)7-5-6-8-14(16)18-10-12(3)4/h11-12H,5-10H2,1-4H3	RDOFJDLLWVCMRU-UHFFFAOYSA-N	Plasticizers
Di(2-ethylhexyl) phthalate	DEHP	CCCCC(CC)COC(C1=CC=CC=C1C(=O)OCC(CC)CCCC)=O	C24H38O4		390.277	391.284	[M+H]+	211	0.0751665	0.0356239	InChI=1S/C24H38O4/c1-5-9-13-19(7-3)17-27-23(25)21-15-11-12-16-22(21)24(26)28-18-20(8-4)14-10-6-2/h11-12,15-16,19-20H,5-10,13-14,17-18H2,1-4H3	BJQHLKABXJIVAM-UHFFFAOYSA-N	Plasticizers
Di(2-ethylhexyl) phthalate	DEHP	CCCCC(CC)COC(C1=CC=CC=C1C(=O)OCC(CC)CCCC)=O	C24H38O4		390.277	413.266	[M+Na]+	215.334	0.0512835	0.0238158	InChI=1S/C24H38O4/c1-5-9-13-19(7-3)17-27-23(25)21-15-11-12-16-22(21)24(26)28-18-20(8-4)14-10-6-2/h11-12,15-16,19-20H,5-10,13-14,17-18H2,1-4H3	BJQHLKABXJIVAM-UHFFFAOYSA-N	Plasticizers
Di(2-ethylhexyl) phthalate	DEHP	CCCCC(CC)COC(C1=CC=CC=C1C(=O)OCC(CC)CCCC)=O	C24H38O4		390.277	803.543	[2M+Na]+	299.81	0.12	0.0400253	InChI=1S/C24H38O4/c1-5-9-13-19(7-3)17-27-23(25)21-15-11-12-16-22(21)24(26)28-18-20(8-4)14-10-6-2/h11-12,15-16,19-20H,5-10,13-14,17-18H2,1-4H3	BJQHLKABXJIVAM-UHFFFAOYSA-N	Plasticizers
Di(2-ethylhexyl) terephthalate	DEHT	CCCCC(CC)COC(=O)C1=CC=C(C=C1)C(=O)OCC(CC)CCCC	C24H38O4		390.277	413.266	[M+Na]+	215.806	0.124218	0.0575598	InChI=1S/C24H38O4/c1-5-9-11-19(7-3)17-27-23(25)21-13-15-22(16-14-21)24(26)28-18-20(8-4)12-10-6-2/h13-16,19-20H,5-12,17-18H2,1-4H3	RWPICVVBGZBXNA-UHFFFAOYSA-N	Plasticizers
Diazinon		CCOP(=S)(OCC)OC1=NC(=NC(=C1)C)C(C)C	C12H21N2O3PS		304.101	305.108	[M+H]+	173.154	0.0476095	0.0274955	InChI=1S/C12H21N2O3PS/c1-6-15-18(19,16-7-2)17-11-8-10(5)13-12(14-11)9(3)4/h8-9H,6-7H2,1-5H3	FHIVAFMUCKRCQO-UHFFFAOYSA-N	Other chemicals
Diazinon		CCOP(=S)(OCC)OC1=NC(=NC(=C1)C)C(C)C	C12H21N2O3PS		304.101	327.09	[M+Na]+	177.722	0.0590903	0.0332487	InChI=1S/C12H21N2O3PS/c1-6-15-18(19,16-7-2)17-11-8-10(5)13-12(14-11)9(3)4/h8-9H,6-7H2,1-5H3	FHIVAFMUCKRCQO-UHFFFAOYSA-N	Other chemicals
Dibutyl sebacate	DBS	CCCCOC(=O)CCCCCCCCC(=O)OCCCC	C18H34O4		314.246	315.253	[M+H]+	183.892	0.0170783	0.00928711	InChI=1S/C18H34O4/c1-3-5-15-21-17(19)13-11-9-7-8-10-12-14-18(20)22-16-6-4-2/h3-16H2,1-2H3	PYGXAGIECVVIOZ-UHFFFAOYSA-N	Other chemicals
Dibutyl sebacate	DBS	CCCCOC(=O)CCCCCCCCC(=O)OCCCC	C18H34O4		314.246	337.235	[M+Na]+	193.482	0.0340343	0.0175904	InChI=1S/C18H34O4/c1-3-5-15-21-17(19)13-11-9-7-8-10-12-14-18(20)22-16-6-4-2/h3-16H2,1-2H3	PYGXAGIECVVIOZ-UHFFFAOYSA-N	Other chemicals
Diisobutyl adipate	DIBA	CC(C)COC(=O)CCCCC(=O)OCC(C)C	C14H26O4		258.183	259.19	[M+H]+	167.82	0.132665	0.079052	InChI=1S/C14H26O4/c1-11(2)9-17-13(15)7-5-6-8-14(16)18-10-12(3)4/h11-12H,5-10H2,1-4H3	RDOFJDLLWVCMRU-UHFFFAOYSA-N	Plasticizers
Diisobutyl adipate	DIBA	CC(C)COC(=O)CCCCC(=O)OCC(C)C	C14H26O4		258.183	281.172	[M+Na]+	180.16	0.03937	0.0218528	InChI=1S/C14H26O4/c1-11(2)9-17-13(15)7-5-6-8-14(16)18-10-12(3)4/h11-12H,5-10H2,1-4H3	RDOFJDLLWVCMRU-UHFFFAOYSA-N	Plasticizers
Diisobutyl adipate	DIBA	CC(C)COC(=O)CCCCC(=O)OCC(C)C	C14H26O4		258.183	539.355	[2M+Na]+	235.886	0.124619	0.0528304	InChI=1S/C14H26O4/c1-11(2)9-17-13(15)7-5-6-8-14(16)18-10-12(3)4/h11-12H,5-10H2,1-4H3	RDOFJDLLWVCMRU-UHFFFAOYSA-N	Plasticizers
Diisodecyl phthalate	DIDP	CC(C)CCCCCCCOC(=O)C1=CC=CC=C1C(=O)OCCCCCCCC(C)C	C28H46O4		446.34	447.347	[M+H]+	227.854	0.105262	0.0461969	InChI=1S/C28H46O4/c1-23(2)17-11-7-5-9-15-21-31-27(29)25-19-13-14-20-26(25)28(30)32-22-16-10-6-8-12-18-24(3)4/h13-14,19-20,23-24H,5-12,15-18,21-22H2,1-4H3	ZVFDTKUVRCTHQE-UHFFFAOYSA-N	Plasticizers
Diisodecyl phthalate	DIDP	CC(C)CCCCCCCOC(=O)C1=CC=CC=C1C(=O)OCCCCCCCC(C)C	C28H46O4		446.34	469.329	[M+Na]+	226.422	0.110318	0.0487222	InChI=1S/C28H46O4/c1-23(2)17-11-7-5-9-15-21-31-27(29)25-19-13-14-20-26(25)28(30)32-22-16-10-6-8-12-18-24(3)4/h13-14,19-20,23-24H,5-12,15-18,21-22H2,1-4H3	ZVFDTKUVRCTHQE-UHFFFAOYSA-N	Plasticizers
Diisodecyl phthalate	DIDP	CC(C)CCCCCCCOC(=O)C1=CC=CC=C1C(=O)OCCCCCCCC(C)C	C28H46O4		446.34	915.668	[2M+Na]+	325.426	0.346309	0.106417	InChI=1S/C28H46O4/c1-23(2)17-11-7-5-9-15-21-31-27(29)25-19-13-14-20-26(25)28(30)32-22-16-10-6-8-12-18-24(3)4/h13-14,19-20,23-24H,5-12,15-18,21-22H2,1-4H3	ZVFDTKUVRCTHQE-UHFFFAOYSA-N	Plasticizers
Diisononyl hexahydrophthalate	DINCH	CC(C)CCCCCCOC(=O)C1CCCCC1C(=O)OCCCCCCC(C)C	C26H48O4		424.355	425.363	[M+H]+	224.816	0.3728	0.165825	InChI=1S/C26H48O4/c1-21(2)15-9-5-7-13-19-29-25(27)23-17-11-12-18-24(23)26(28)30-20-14-8-6-10-16-22(3)4/h21-24H,5-20H2,1-4H3	HORIEOQXBKUKGQ-UHFFFAOYSA-N	Plasticizers
Diisononyl hexahydrophthalate	DINCH	CC(C)CCCCCCOC(=O)C1CCCCC1C(=O)OCCCCCCC(C)C	C26H48O4		424.355	447.344	[M+Na]+	222.032	0.118406	0.0533284	InChI=1S/C26H48O4/c1-21(2)15-9-5-7-13-19-29-25(27)23-17-11-12-18-24(23)26(28)30-20-14-8-6-10-16-22(3)4/h21-24H,5-20H2,1-4H3	HORIEOQXBKUKGQ-UHFFFAOYSA-N	Plasticizers
Diisononyl hexahydrophthalate	DINCH	CC(C)CCCCCCOC(=O)C1CCCCC1C(=O)OCCCCCCC(C)C	C26H48O4		424.355	871.7	[2M+Na]+	316.744	0.378985	0.11965	InChI=1S/C26H48O4/c1-21(2)15-9-5-7-13-19-29-25(27)23-17-11-12-18-24(23)26(28)30-20-14-8-6-10-16-22(3)4/h21-24H,5-20H2,1-4H3	HORIEOQXBKUKGQ-UHFFFAOYSA-N	Plasticizers
Diisononyl phthalate	DINP	CC(C)CCCCCCOC(=O)C1=CC=CC=C1C(=O)OCCCCCCC(C)C	C26H42O4		418.308	419.316	[M+H]+	220.604	0.0996494	0.0451712	InChI=1S/C26H42O4/c1-21(2)15-9-5-7-13-19-29-25(27)23-17-11-12-18-24(23)26(28)30-20-14-8-6-10-16-22(3)4/h11-12,17-18,21-22H,5-10,13-16,19-20H2,1-4H3	HBGGXOJOCNVPFY-UHFFFAOYSA-N	Plasticizers
Diisononyl phthalate	DINP	CC(C)CCCCCCOC(=O)C1=CC=CC=C1C(=O)OCCCCCCC(C)C	C26H42O4		418.308	441.298	[M+Na]+	220.94	0.087178	0.0394578	InChI=1S/C26H42O4/c1-21(2)15-9-5-7-13-19-29-25(27)23-17-11-12-18-24(23)26(28)30-20-14-8-6-10-16-22(3)4/h11-12,17-18,21-22H,5-10,13-16,19-20H2,1-4H3	HBGGXOJOCNVPFY-UHFFFAOYSA-N	Plasticizers
Diisononyl phthalate	DINP	CC(C)CCCCCCOC(=O)C1=CC=CC=C1C(=O)OCCCCCCC(C)C	C26H42O4		418.308	859.606	[2M+Na]+	313.438	0.391178	0.124802	InChI=1S/C26H42O4/c1-21(2)15-9-5-7-13-19-29-25(27)23-17-11-12-18-24(23)26(28)30-20-14-8-6-10-16-22(3)4/h11-12,17-18,21-22H,5-10,13-16,19-20H2,1-4H3	HBGGXOJOCNVPFY-UHFFFAOYSA-N	Plasticizers
Dimethyl azelate	DMA	COC(=O)CCCCCCCC(=O)OC	C11H20O4		216.136	239.125	[M+Na]+	155.542	0.0287228	0.0184663	InChI=1S/C11H20O4/c1-14-10(12)8-6-4-3-5-7-9-11(13)15-2/h3-9H2,1-2H3	DRUKNYVQGHETPO-UHFFFAOYSA-N	Plasticizers
Dimethylsebacate	DMS	COC(=O)CCCCCCCCC(=O)OC	C12H22O4		230.152	253.141	[M+Na]+	159.706	0.0355903	0.0222849	InChI=1S/C12H22O4/c1-15-11(13)9-7-5-3-4-6-8-10-12(14)16-2/h3-10H2,1-2H3	ALOUNLDAKADEEB-UHFFFAOYSA-N	Other chemicals
Di-n-butyl phosphate	DnBP	CCCCOP(=O)(O)OCCCC	C8H19PO4		210.102	233.091	[M+Na]+	167.536	0.0403113	0.0240613	InChI=1S/C8H19O4P/c1-3-5-7-11-13(9,10)12-8-6-4-2/h3-8H2,1-2H3,(H,9,10)	JYFHYPJRHGVZDY-UHFFFAOYSA-N	OP metabolites
Di-n-butyl phosphate	DnBP	CCCCOP(=O)(O)OCCCC	C8H19PO4		210.102	209.095	[M-H]-	150.887	0.0152753	0.0101237	InChI=1S/C8H19O4P/c1-3-5-7-11-13(9,10)12-8-6-4-2/h3-8H2,1-2H3,(H,9,10)	JYFHYPJRHGVZDY-UHFFFAOYSA-N	OP metabolites
Di-O-cresylphosphate	DOCP	CC1=CC=CC=C1OP(=O)(O)OC2=CC=CC=C2C	C14H15O4P		278.071	279.078	[M+H]+	163.586	0.0725718	0.0443631	InChI=1S/C14H15O4P/c1-11-7-3-5-9-13(11)17-19(15,16)18-14-10-6-4-8-12(14)2/h3-10H,1-2H3,(H,15,16)	OHRCKPRYDGSBRN-UHFFFAOYSA-N	OP metabolites
Di-O-cresylphosphate	DOCP	CC1=CC=CC=C1OP(=O)(O)OC2=CC=CC=C2C	C14H15O4P		278.071	301.06	[M+Na]+	169.398	0.0732575	0.0432458	InChI=1S/C14H15O4P/c1-11-7-3-5-9-13(11)17-19(15,16)18-14-10-6-4-8-12(14)2/h3-10H,1-2H3,(H,15,16)	OHRCKPRYDGSBRN-UHFFFAOYSA-N	OP metabolites
Di-O-cresylphosphate	DOCP	CC1=CC=CC=C1OP(=O)(O)OC2=CC=CC=C2C	C14H15O4P		278.071	557.149	[2M+H]+	218.36	0.352361	0.161367	InChI=1S/C14H15O4P/c1-11-7-3-5-9-13(11)17-19(15,16)18-14-10-6-4-8-12(14)2/h3-10H,1-2H3,(H,15,16)	OHRCKPRYDGSBRN-UHFFFAOYSA-N	OP metabolites
Di-O-cresylphosphate	DOCP	CC1=CC=CC=C1OP(=O)(O)OC2=CC=CC=C2C	C14H15O4P		278.071	579.131	[2M+Na]+	225.36	0.148408	0.0658538	InChI=1S/C14H15O4P/c1-11-7-3-5-9-13(11)17-19(15,16)18-14-10-6-4-8-12(14)2/h3-10H,1-2H3,(H,15,16)	OHRCKPRYDGSBRN-UHFFFAOYSA-N	OP metabolites
Diphenyl hydrogen phosphate	DPhP	C1=CC=C(C=C1)OP(=O)(O)OC2=CC=CC=C2	C12H11O4P		250.04	251.047	[M+H]+	157.406	0.0680441	0.0432284	InChI=1S/C12H11O4P/c13-17(14,15-11-7-3-1-4-8-11)16-12-9-5-2-6-10-12/h1-10H,(H,13,14)	ASMQGLCHMVWBQR-UHFFFAOYSA-N	OP metabolites
Diphenyl hydrogen phosphate	DPhP	C1=CC=C(C=C1)OP(=O)(O)OC2=CC=CC=C2	C12H11O4P		250.04	273.029	[M+Na]+	164.384	0.146219	0.0889497	InChI=1S/C12H11O4P/c13-17(14,15-11-7-3-1-4-8-11)16-12-9-5-2-6-10-12/h1-10H,(H,13,14)	ASMQGLCHMVWBQR-UHFFFAOYSA-N	OP metabolites
Diphenyl hydrogen phosphate	DPhP	C1=CC=C(C=C1)OP(=O)(O)OC2=CC=CC=C2	C12H11O4P		250.04	249.032	[M-H]-	152.816	0.0151658	0.00992419	InChI=1S/C12H11O4P/c13-17(14,15-11-7-3-1-4-8-11)16-12-9-5-2-6-10-12/h1-10H,(H,13,14)	ASMQGLCHMVWBQR-UHFFFAOYSA-N	OP metabolites
Diphenyl phthalate	DPP	O=C(OC1=CC=CC=C1)C1=CC=CC=C1C(=O)OC1=CC=CC=C1	C20H14O4		318.089	341.078	[M+Na]+	181.27	0.0369685	0.0203941	InChI=1S/C20H14O4/c21-19(23-15-9-3-1-4-10-15)17-13-7-8-14-18(17)20(22)24-16-11-5-2-6-12-16/h1-14H	DWNAQMUDCDVSLT-UHFFFAOYSA-N	Plasticizers
Diphenyl phthalate	DPP	O=C(OC1=CC=CC=C1)C1=CC=CC=C1C(=O)OC1=CC=CC=C1	C20H14O4		318.089	659.168	[2M+Na]+	238.24	0.0531507	0.0223097	InChI=1S/C20H14O4/c21-19(23-15-9-3-1-4-10-15)17-13-7-8-14-18(17)20(22)24-16-11-5-2-6-12-16/h1-14H	DWNAQMUDCDVSLT-UHFFFAOYSA-N	Plasticizers
Diphenylcresyl phosphate	CDPHP	CC1=CC=CC=C1OP(=O)(OC2=CC=CC=C2)OC3=CC=CC=C3	C19H17O4P		340.086	341.094	[M+H]+	180.48	0.0216025	0.0119695	InChI=1S/C19H17O4P/c1-16-10-8-9-15-19(16)23-24(20,21-17-11-4-2-5-12-17)22-18-13-6-3-7-14-18/h2-15H,1H3	XMNDMAQKWSQVOV-UHFFFAOYSA-N	organophosphorus flame retardant (OP)
Diphenylcresyl phosphate	CDPHP	CC1=CC=CC=C1OP(=O)(OC2=CC=CC=C2)OC3=CC=CC=C3	C19H17O4P		340.086	363.076	[M+Na]+	190.532	0.0496655	0.0260668	InChI=1S/C19H17O4P/c1-16-10-8-9-15-19(16)23-24(20,21-17-11-4-2-5-12-17)22-18-13-6-3-7-14-18/h2-15H,1H3	XMNDMAQKWSQVOV-UHFFFAOYSA-N	organophosphorus flame retardant (OP)
Diphenylcresyl phosphate	CDPHP	CC1=CC=CC=C1OP(=O)(OC2=CC=CC=C2)OC3=CC=CC=C3	C19H17O4P		340.086	681.18	[2M+H]+	250.722	0.415241	0.165618	InChI=1S/C19H17O4P/c1-16-10-8-9-15-19(16)23-24(20,21-17-11-4-2-5-12-17)22-18-13-6-3-7-14-18/h2-15H,1H3	XMNDMAQKWSQVOV-UHFFFAOYSA-N	organophosphorus flame retardant (OP)
Diphenylcresyl phosphate	CDPHP	CC1=CC=CC=C1OP(=O)(OC2=CC=CC=C2)OC3=CC=CC=C3	C19H17O4P		340.086	703.162	[2M+Na]+	257.29	0.0442531	0.0171997	InChI=1S/C19H17O4P/c1-16-10-8-9-15-19(16)23-24(20,21-17-11-4-2-5-12-17)22-18-13-6-3-7-14-18/h2-15H,1H3	XMNDMAQKWSQVOV-UHFFFAOYSA-N	organophosphorus flame retardant (OP)
Dipropyleneglycol dibenzoate		CC(COC(C)COC(=O)C1=CC=CC=C1)OC(=O)C2=CC=CC=C2	C20H22O5		342.147	365.136	[M+Na]+	186.322	1.35408	0.72674	InChI=1S/C20H22O5/c1-15(13-24-19(21)17-9-5-3-6-10-17)23-14-16(2)25-20(22)18-11-7-4-8-12-18/h3-12,15-16H,13-14H2,1-2H3	LXODQLXKQIJVNK-UHFFFAOYSA-N	Other chemicals
Hexafluoropropylene oxide dimer acid	HFPO-DA	C(=O)(C(C(F)(F)F)(OC(C(C(F)(F)F)(F)F)(F)F)F)O	C6HF11O3		329.975	658.943	[2M-H]-	198.61	0.0910586	0.0458479	InChI=1S/C6HF11O3/c7-2(1(18)19,4(10,11)12)20-6(16,17)3(8,9)5(13,14)15/h(H,18,19)	CSEBNABAWMZWIF-UHFFFAOYSA-N	PFAS
Hexafluoropropylene oxide dimer acid	HFPO-DA	C(=O)(C(C(F)(F)F)(OC(C(C(F)(F)F)(F)F)(F)F)F)O	C6HF11O3		329.975	284.978	[M-H-CO2]-	126.886	0.0853913	0.0672976	InChI=1S/C6HF11O3/c7-2(1(18)19,4(10,11)12)20-6(16,17)3(8,9)5(13,14)15/h(H,18,19)	CSEBNABAWMZWIF-UHFFFAOYSA-N	PFAS
Isodecyl diphenyl phosphate	iDPP	CC(C)CCCCCCCOP(=O)(OC1=CC=CC=C1)OC2=CC=CC=C2	C22H31O4P		390.196	391.203	[M+H]+	200.204	0.0926283	0.046267	InChI=1S/C22H31O4P/c1-20(2)14-8-4-3-5-13-19-24-27(23,25-21-15-9-6-10-16-21)26-22-17-11-7-12-18-22/h6-7,9-12,15-18,20H,3-5,8,13-14,19H2,1-2H3	RYUJRXVZSJCHDZ-UHFFFAOYSA-N	organophosphorus flame retardant (OP)
Isodecyl diphenyl phosphate	iDPP	CC(C)CCCCCCCOP(=O)(OC1=CC=CC=C1)OC2=CC=CC=C2	C22H31O4P		390.196	413.185	[M+Na]+	207.302	0.0277489	0.0133857	InChI=1S/C22H31O4P/c1-20(2)14-8-4-3-5-13-19-24-27(23,25-21-15-9-6-10-16-21)26-22-17-11-7-12-18-22/h6-7,9-12,15-18,20H,3-5,8,13-14,19H2,1-2H3	RYUJRXVZSJCHDZ-UHFFFAOYSA-N	organophosphorus flame retardant (OP)
Isodecyl diphenyl phosphate	iDPP	CC(C)CCCCCCCOP(=O)(OC1=CC=CC=C1)OC2=CC=CC=C2	C22H31O4P		390.196	803.381	[2M+Na]+	290.506	0.0517687	0.0178202	InChI=1S/C22H31O4P/c1-20(2)14-8-4-3-5-13-19-24-27(23,25-21-15-9-6-10-16-21)26-22-17-11-7-12-18-22/h6-7,9-12,15-18,20H,3-5,8,13-14,19H2,1-2H3	RYUJRXVZSJCHDZ-UHFFFAOYSA-N	organophosphorus flame retardant (OP)
Isooctyl-2-phenoxyethyl terephthalate	IOPhEt	CC(C)CCCCCOC(=O)C1=CC=C(C=C1)C(=O)OCCOC2=CC=CC=C2	C24H30O5		398.209	399.217	[M+H]+	218.608	0.0881476	0.0403222	InChI=1S/C24H30O5/c1-19(2)9-5-4-8-16-28-23(25)20-12-14-21(15-13-20)24(26)29-18-17-27-22-10-6-3-7-11-22/h3,6-7,10-15,19H,4-5,8-9,16-18H2,1-2H3	OCSJGBJBLWZYQQ-UHFFFAOYSA-N	Plasticizers
Isooctyl-2-phenoxyethyl terephthalate	IOPhEt	CC(C)CCCCCOC(=O)C1=CC=C(C=C1)C(=O)OCCOC2=CC=CC=C2	C24H30O5		398.209	421.199	[M+Na]+	227.37	0.087178	0.0383419	InChI=1S/C24H30O5/c1-19(2)9-5-4-8-16-28-23(25)20-12-14-21(15-13-20)24(26)29-18-17-27-22-10-6-3-7-11-22/h3,6-7,10-15,19H,4-5,8-9,16-18H2,1-2H3	OCSJGBJBLWZYQQ-UHFFFAOYSA-N	Plasticizers
Mono(2-ethyl-5-carboxypentyl) adipate	5-cx-MEHA	CCC(CCCC(=O)O)COC(=O)CCCCC(=O)O	C14H24O6		288.157	311.147	[M+Na]+	170.006	0.0502991	0.0295867	InChI=1S/C14H24O6/c1-2-11(6-5-8-13(17)18)10-20-14(19)9-4-3-7-12(15)16/h11H,2-10H2,1H3,(H,15,16)(H,17,18)	GSEREAHHKPORII-UHFFFAOYSA-N	Plasticizer metabolites
Mono(2-ethyl-5-carboxypentyl) adipate	5-cx-MEHA	CCC(CCCC(=O)O)COC(=O)CCCCC(=O)O	C14H24O6		288.157	287.15	[M-H]-	167.034	0.02881	0.017248	InChI=1S/C14H24O6/c1-2-11(6-5-8-13(17)18)10-20-14(19)9-4-3-7-12(15)16/h11H,2-10H2,1H3,(H,15,16)(H,17,18)	GSEREAHHKPORII-UHFFFAOYSA-N	Plasticizer metabolites
Mono-(2-ethyl-5-carboxypentyl) phthalate	5-cx-MEPP	CCC(CCCC(=O)O)COC(=O)C1=CC=CC=C1C(=O)O	C16H20O6		308.126	331.115	[M+Na]+	174.448	0.0730297	0.0418633	InChI=1S/C16H20O6/c1-2-11(6-5-9-14(17)18)10-22-16(21)13-8-4-3-7-12(13)15(19)20/h3-4,7-8,11H,2,5-6,9-10H2,1H3,(H,17,18)(H,19,20)	XFGRNAPKLGXDGF-UHFFFAOYSA-N	Plasticizer metabolites
Mono-(2-ethyl-5-carboxypentyl) phthalate	5-cx-MEPP	CCC(CCCC(=O)O)COC(=O)C1=CC=CC=C1C(=O)O	C16H20O6		308.126	307.119	[M-H]-	169.868	0.0556028	0.0327329	InChI=1S/C16H20O6/c1-2-11(6-5-9-14(17)18)10-22-16(21)13-8-4-3-7-12(13)15(19)20/h3-4,7-8,11H,2,5-6,9-10H2,1H3,(H,17,18)(H,19,20)	XFGRNAPKLGXDGF-UHFFFAOYSA-N	Plasticizer metabolites
Mono(2-ethyl-5-carboxypentyl) terephthalate	5-cx-MEPTP	CCC(CCCC(=O)O)COC(=O)C1=CC=C(C=C1)C(=O)O	C16H20O6		308.126	307.119	[M-H]-	168.42	0.05	0.0296877	InChI=1S/C16H20O6/c1-2-11(4-3-5-14(17)18)10-22-16(21)13-8-6-12(7-9-13)15(19)20/h6-9,11H,2-5,10H2,1H3,(H,17,18)(H,19,20)	BIQPFHSSQDGFTK-UHFFFAOYSA-N	Plasticizer metabolites
Mono(2-ethyl-5-hydroxyhexyl) adipate	5OH-MEHA	CCC(CCC(C)O)COC(=O)CCCCC(=O)O	C14H26O5		274.178	297.167	[M+Na]+	168.704	0.0258199	0.0153048	InChI=1S/C14H26O5/c1-3-12(9-8-11(2)15)10-19-14(18)7-5-4-6-13(16)17/h11-12,15H,3-10H2,1-2H3,(H,16,17)	GUWFIYHOYMKEJE-UHFFFAOYSA-N	Plasticizer metabolites
Mono(2-ethyl-5-hydroxyhexyl) adipate	5OH-MEHA	CCC(CCC(C)O)COC(=O)CCCCC(=O)O	C14H26O5		274.178	273.171	[M-H]-	165.787	0.040311	0.024315	InChI=1S/C14H26O5/c1-3-12(9-8-11(2)15)10-19-14(18)7-5-4-6-13(16)17/h11-12,15H,3-10H2,1-2H3,(H,16,17)	GUWFIYHOYMKEJE-UHFFFAOYSA-N	Plasticizer metabolites
Mono(2-ethyl-5-hydroxyhexyl) phthalate	5OH-MEHP	CCC(CCC(C)O)COC(=O)C1=CC=CC=C1C(=O)O	C16H22O5		294.147	317.136	[M+Na]+	172.918	0.0506623	0.0292984	InChI=1S/C16H22O5/c1-3-12(9-8-11(2)17)10-21-16(20)14-7-5-4-6-13(14)15(18)19/h4-7,11-12,17H,3,8-10H2,1-2H3,(H,18,19)	RYPQSGURZSTFSX-UHFFFAOYSA-N	Plasticizer metabolites
Mono(2-ethyl-5-hydroxyhexyl) phthalate	5OH-MEHP	CCC(CCC(C)O)COC(=O)C1=CC=CC=C1C(=O)O	C16H22O5		294.147	293.139	[M-H]-	168.986	0.0288675	0.0170828	InChI=1S/C16H22O5/c1-3-12(9-8-11(2)17)10-21-16(20)14-7-5-4-6-13(14)15(18)19/h4-7,11-12,17H,3,8-10H2,1-2H3,(H,18,19)	RYPQSGURZSTFSX-UHFFFAOYSA-N	Plasticizer metabolites
Mono(2-ethyl-5-hydroxyhexyl) terephthalate	5OH-MEHTP	CCC(CCC(C)O)COC(=O)c1ccc(C(=O)O)cc1	C16H22O5		294.147	293.139	[M-H]-	185.076	0.0914695	0.0494227	InChI=1S/C16H22O5/c1-3-12(5-4-11(2)17)10-21-16(20)14-8-6-13(7-9-14)15(18)19/h6-9,11-12,17H,3-5,10H2,1-2H3,(H,18,19)	ODRKAFOVPBFSIN-UHFFFAOYSA-N	Plasticizer metabolites
Mono(2-ethyl-5-oxohexyl) adipate	5-oxo-MEHA	CCC(CCC(=O)C)COC(=O)CCCCC(=O)O	C14H24O5		272.162	295.152	[M+Na]+	165.908	0.0544671	0.0328297	InChI=1S/C14H24O5/c1-3-12(9-8-11(2)15)10-19-14(18)7-5-4-6-13(16)17/h12H,3-10H2,1-2H3,(H,16,17)	XLMWFRRVVDGMRV-UHFFFAOYSA-N	Plasticizer metabolites
Mono(2-ethyl-5-oxohexyl) adipate	5-oxo-MEHA	CCC(CCC(=O)C)COC(=O)CCCCC(=O)O	C14H24O5		272.162	271.155	[M-H]-	165.29	0.0499166	0.0301994	InChI=1S/C14H24O5/c1-3-12(9-8-11(2)15)10-19-14(18)7-5-4-6-13(16)17/h12H,3-10H2,1-2H3,(H,16,17)	XLMWFRRVVDGMRV-UHFFFAOYSA-N	Plasticizer metabolites
Mono(2-ethyl-5-oxohexyl)phthalate	5-oxo-MEHP	CCC(CCC(=O)C)COC(=O)C1=CC=CC=C1C(=O)O	C16H20O5		292.131	291.124	[M-H]-	168.346	0.030957	0.0183889	InChI=1S/C16H20O5/c1-3-12(9-8-11(2)17)10-21-16(20)14-7-5-4-6-13(14)15(18)19/h4-7,12H,3,8-10H2,1-2H3,(H,18,19)	HCWNFKHKKHNSSL-UHFFFAOYSA-N	Plasticizer metabolites
Mono(2-ethyl-5-oxohexyl)phthalate	5-oxo-MEHP	CCC(CCC(=O)C)COC(=O)C1=CC=CC=C1C(=O)O	C16H20O5		292.131	315.12	[M+Na]+	170.18	0.0254951	0.0149813	InChI=1S/C16H20O5/c1-3-12(9-8-11(2)17)10-21-16(20)14-7-5-4-6-13(14)15(18)19/h4-7,12H,3,8-10H2,1-2H3,(H,18,19)	HCWNFKHKKHNSSL-UHFFFAOYSA-N	Plasticizer metabolites
Mono(2-ethylhexyl) adipate	MEHA	CCCCC(CC)COC(=O)CCCCC(=O)O	C14H26O4		258.183	281.172	[M+Na]+	177.322	0.107393	0.060564	InChI=1S/C14H26O4/c1-3-5-8-12(4-2)11-18-14(17)10-7-6-9-13(15)16/h12H,3-11H2,1-2H3,(H,15,16)	MBGYSHXGENGTBP-UHFFFAOYSA-N	Plasticizer metabolites
Mono(2-ethylhexyl) adipate	MEHA	CCCCC(CC)COC(=O)CCCCC(=O)O	C14H26O4		258.183	257.176	[M-H]-	166.762	0.029861	0.017906	InChI=1S/C14H26O4/c1-3-5-8-12(4-2)11-18-14(17)10-7-6-9-13(15)16/h12H,3-11H2,1-2H3,(H,15,16)	MBGYSHXGENGTBP-UHFFFAOYSA-N	Plasticizer metabolites
Mono(2-ethylhexyl) phthalate	MEHP	CCCCC(CC)COC(=O)C1=CC=CC=C1C(=O)O	C16H22O4		278.152	301.141	[M+Na]+	182.272	0.0419325	0.0230054	InChI=1S/C16H22O4/c1-3-5-8-12(4-2)11-20-16(19)14-10-7-6-9-13(14)15(17)18/h6-7,9-10,12H,3-5,8,11H2,1-2H3,(H,17,18)	DJDSLBVSSOQSLW-UHFFFAOYSA-N	Plasticizer metabolites
Mono(2-ethylhexyl) phthalate	MEHP	CCCCC(CC)COC(=O)C1=CC=CC=C1C(=O)O	C16H22O4		278.152	277.145	[M-H]-	168.914	0.0571548	0.0338366	InChI=1S/C16H22O4/c1-3-5-8-12(4-2)11-20-16(19)14-10-7-6-9-13(14)15(17)18/h6-7,9-10,12H,3-5,8,11H2,1-2H3,(H,17,18)	DJDSLBVSSOQSLW-UHFFFAOYSA-N	Plasticizer metabolites
Mono(2-ethylhexyl) terephthalate	MEHTP	CCCCC(CC)COC(=O)C1=CC=C(C=C1)C(=O)O	C16H22O4		278.152	277.145	[M-H]-	183.538	0.0294392	0.0160398	InChI=1S/C16H22O4/c1-3-5-6-12(4-2)11-20-16(19)14-9-7-13(8-10-14)15(17)18/h7-10,12H,3-6,11H2,1-2H3,(H,17,18)	HRUJAEJKCNCOGW-UHFFFAOYSA-N	Plasticizer metabolites
Mono(2-ethyl-oxo-hexyl) trimelliate		CCC(CCC(C)=O)COC(=O)c1cc(C(=O)O)ccc1C(=O)O	C17H20O7		336.121	335.114	[M-H]-	178.84	0.012247	0.006848	InChI=1S/C17H20O7/c1-3-11(5-4-10(2)18)9-24-17(23)14-8-12(15(19)20)6-7-13(14)16(21)22/h6-8,11H,3-5,9H2,1-2H3,(H,19,20)(H,21,22)	BAIGYCWXMXEZKY-UHFFFAOYSA-N	Plasticizer metabolites
Mono(2-propyl-6-carboxyhexyl) phthalate	6-cx-MPHxP	CCCC(CCCCC(=O)O)COC(=O)c1ccccc1C(=O)O	C18H24O6		336.157	359.147	[M+Na]+	183.646	0.0591608	0.0322146	InChI=1S/C18H24O6/c1-2-7-13(8-3-6-11-16(19)20)12-24-18(23)15-10-5-4-9-14(15)17(21)22/h4-5,9-10,13H,2-3,6-8,11-12H2,1H3,(H,19,20)(H,21,22)	DPQMLPCFIOCYFY-UHFFFAOYSA-N	Plasticizer metabolites
Mono(2-propyl-6-carboxyhexyl) phthalate	6-cx-MPHxP	CCCC(CCCCC(=O)O)COC(=O)c1ccccc1C(=O)O	C18H24O6		336.157	335.15	[M-H]-	179.642	0.0206155	0.0114759	InChI=1S/C18H24O6/c1-2-7-13(8-3-6-11-16(19)20)12-24-18(23)15-10-5-4-9-14(15)17(21)22/h4-5,9-10,13H,2-3,6-8,11-12H2,1H3,(H,19,20)(H,21,22)	DPQMLPCFIOCYFY-UHFFFAOYSA-N	Plasticizer metabolites
Mono-(3-carboxypropyl) phthalate	3-cx-MCPP	C1=CC=C(C(=C1)C(=O)O)C(=O)OCCCC(=O)O	C12H12O6		252.063	275.053	[M+Na]+	156.948	0.0853913	0.0544074	InChI=1S/C12H12O6/c13-10(14)6-3-7-18-12(17)9-5-2-1-4-8(9)11(15)16/h1-2,4-5H,3,6-7H2,(H,13,14)(H,15,16)	IYTPMLIWBZMBSL-UHFFFAOYSA-N	Plasticizer metabolites
Mono-1-(2-ethyl-5-carboxyhexyl)trimellitate		CCC(CCCC(=O)O)COC(=O)c1cc(C(=O)O)ccc1C(=O)O	C17H20O8		352.116	375.105	[M+Na]+	187.564	0.086487	0.0461107	InChI=1S/C17H20O8/c1-2-10(4-3-5-14(18)19)9-25-17(24)13-8-11(15(20)21)6-7-12(13)16(22)23/h6-8,10H,2-5,9H2,1H3,(H,18,19)(H,20,21)(H,22,23)	MYRUZGHSNOQPCX-UHFFFAOYSA-N	Plasticizer metabolites
Mono-1-(2-ethyl-5-carboxyhexyl)trimellitate		CCC(CCCC(=O)O)COC(=O)c1cc(C(=O)O)ccc1C(=O)O	C17H20O8		352.116	351.109	[M-H]-	180.558	0.030332	0.016799	InChI=1S/C17H20O8/c1-2-10(4-3-5-14(18)19)9-25-17(24)13-8-11(15(20)21)6-7-12(13)16(22)23/h6-8,10H,2-5,9H2,1H3,(H,18,19)(H,20,21)(H,22,23)	MYRUZGHSNOQPCX-UHFFFAOYSA-N	Plasticizer metabolites
Mono-1-[2(carboxymethyl)hexyl] trimellitate		CCCCC(COC(=O)c1cc(C(=O)O)ccc1C(=O)O)CC(=O)O	C17H20O8		352.116	375.105	[M+Na]+	189.844	0.0522494	0.0275223	InChI=1S/C17H20O8/c1-2-3-4-10(7-14(18)19)9-25-17(24)13-8-11(15(20)21)5-6-12(13)16(22)23/h5-6,8,10H,2-4,7,9H2,1H3,(H,18,19)(H,20,21)(H,22,23)	FMMORJZKJAKBBI-UHFFFAOYSA-N	Plasticizer metabolites
Mono-1-[2(carboxymethyl)hexyl] trimellitate		CCCCC(COC(=O)c1cc(C(=O)O)ccc1C(=O)O)CC(=O)O	C17H20O8		352.116	351.109	[M-H]-	182.23	0.1	0.054876	InChI=1S/C17H20O8/c1-2-3-4-10(7-14(18)19)9-25-17(24)13-8-11(15(20)21)5-6-12(13)16(22)23/h5-6,8,10H,2-4,7,9H2,1H3,(H,18,19)(H,20,21)(H,22,23)	FMMORJZKJAKBBI-UHFFFAOYSA-N	Plasticizer metabolites
Mono-2-(propyl-6-oxoheptyl)-phthalate	6-oxo-MPHP	CCCC(CCCC(C)=O)COC(=O)c1ccccc1C(=O)O	C18H24O5		320.162	343.152	[M+Na]+	180.202	0.0694622	0.0385469	InChI=1S/C18H24O5/c1-3-7-14(9-6-8-13(2)19)12-23-18(22)16-11-5-4-10-15(16)17(20)21/h4-5,10-11,14H,3,6-9,12H2,1-2H3,(H,20,21)	NSGSMZPMFOBAFF-UHFFFAOYSA-N	Plasticizer metabolites
Mono-2-(propyl-6-oxoheptyl)-phthalate	6-oxo-MPHP	CCCC(CCCC(C)=O)COC(=O)c1ccccc1C(=O)O	C18H24O5		320.162	319.155	[M-H]-	177.696	0.0465475	0.026195	InChI=1S/C18H24O5/c1-3-7-14(9-6-8-13(2)19)12-23-18(22)16-11-5-4-10-15(16)17(20)21/h4-5,10-11,14H,3,6-9,12H2,1-2H3,(H,20,21)	NSGSMZPMFOBAFF-UHFFFAOYSA-N	Plasticizer metabolites
Mono-carboxy-isononyl phthalate	7-cx-MiNP	CC(CCCCCCCC(=O)O)OC(=O)C1=CC=CC=C1C(=O)O	C18H24O6		336.157	359.147	[M+Na]+	182.642	0.102429	0.0560818	InChI=1S/C18H24O6/c1-13(9-5-3-2-4-6-12-16(19)20)24-18(23)15-11-8-7-10-14(15)17(21)22/h7-8,10-11,13H,2-6,9,12H2,1H3,(H,19,20)(H,21,22)	IOWADRRGIUUGJH-UHFFFAOYSA-N	Plasticizer metabolites
Mono-carboxy-isononyl phthalate	7-cx-MiNP	CC(CCCCCCCC(=O)O)OC(=O)C1=CC=CC=C1C(=O)O	C18H24O6		336.157	335.15	[M-H]-	177.472	0.0439697	0.0247756	InChI=1S/C18H24O6/c1-13(9-5-3-2-4-6-12-16(19)20)24-18(23)15-11-8-7-10-14(15)17(21)22/h7-8,10-11,13H,2-6,9,12H2,1H3,(H,19,20)(H,21,22)	IOWADRRGIUUGJH-UHFFFAOYSA-N	Plasticizer metabolites
Monocyclohexyl phthalate	MCHP	C1CCC(CC1)OC(=O)C2=CC=CC=C2C(=O)O	C14H16O4		248.105	247.098	[M-H]-	159.718	0.0689807	0.043189	InChI=1S/C14H16O4/c15-13(16)11-8-4-5-9-12(11)14(17)18-10-6-2-1-3-7-10/h4-5,8-10H,1-3,6-7H2,(H,15,16)	PMDKYLLIOLFQPO-UHFFFAOYSA-N	Plasticizer metabolites
Mono-ethyl phthalate	MEP	CCOC(=O)C1=CC=CC=C1C(=O)O	C10H10O4		194.058	193.051	[M-H]-	141.674	0.0391578	0.0276394	InChI=1S/C10H10O4/c1-2-14-10(13)8-6-4-3-5-7(8)9(11)12/h3-6H,2H2,1H3,(H,11,12)	YWWHKOHZGJFMIE-UHFFFAOYSA-N	Plasticizer metabolites
Mono-hydroxy-isononyl phthalate	7OH-MiNP	CC(O)CCC(C)CCCOC(=O)C1=CC=CC=C1C(O)=O	C17H24O5		308.162	331.152	[M+Na]+	176.6	0.0170783	0.00967058	InChI=1S/C17H24O5/c1-12(9-10-13(2)18)6-5-11-22-17(21)15-8-4-3-7-14(15)16(19)20/h3-4,7-8,12-13,18H,5-6,9-11H2,1-2H3,(H,19,20)	RWCHSWLUPRJYEX-UHFFFAOYSA-N	Plasticizer metabolites
Mono-hydroxy-isononyl phthalate	7OH-MiNP	CC(O)CCC(C)CCCOC(=O)C1=CC=CC=C1C(O)=O	C17H24O5		308.162	307.155	[M-H]-	172.502	0.0316228	0.0183318	InChI=1S/C17H24O5/c1-12(9-10-13(2)18)6-5-11-22-17(21)15-8-4-3-7-14(15)16(19)20/h3-4,7-8,12-13,18H,5-6,9-11H2,1-2H3,(H,19,20)	RWCHSWLUPRJYEX-UHFFFAOYSA-N	Plasticizer metabolites
Mono-iso-butyl phthalate	MiBP	CC(C)COC(=O)C1=CC=CC=C1C(=O)O	C12H14O4		222.089	245.078	[M+Na]+	163.432	0.0550757	0.0336995	InChI=1S/C12H14O4/c1-8(2)7-16-12(15)10-6-4-3-5-9(10)11(13)14/h3-6,8H,7H2,1-2H3,(H,13,14)	RZJSUWQGFCHNFS-UHFFFAOYSA-N	Plasticizer metabolites
Mono-iso-butyl phthalate	MiBP	CC(C)COC(=O)C1=CC=CC=C1C(=O)O	C12H14O4		222.089	221.082	[M-H]-	151.834	0.0499166	0.0328758	InChI=1S/C12H14O4/c1-8(2)7-16-12(15)10-6-4-3-5-9(10)11(13)14/h3-6,8H,7H2,1-2H3,(H,13,14)	RZJSUWQGFCHNFS-UHFFFAOYSA-N	Plasticizer metabolites
Mono-isononyl-cyclohexane-1,2-dicarboxylate	cis-MINCH	CCCCC(C)CCCOC(=O)[C@@H]1CCCC[C@@H]1C(=O)O	C17H30O4		298.214	321.204	[M+Na]+	185.87	0.0476095	0.0256144	InChI=1S/C17H30O4/c1-3-4-8-13(2)9-7-12-21-17(20)15-11-6-5-10-14(15)16(18)19/h13-15H,3-12H2,1-2H3,(H,18,19)/t13?,14-,15+/m0/s1	IGGVQTVKZINOGK-NOYMGPGASA-N	Plasticizer metabolites
Mono-isononyl-cyclohexane-1,2-dicarboxylate	cis-MINCH	CCCCC(C)CCCOC(=O)[C@@H]1CCCC[C@@H]1C(=O)O	C17H30O4		298.214	297.207	[M-H]-	175.482	0.0264575	0.0150771	InChI=1S/C17H30O4/c1-3-4-8-13(2)9-7-12-21-17(20)15-11-6-5-10-14(15)16(18)19/h13-15H,3-12H2,1-2H3,(H,18,19)/t13?,14-,15+/m0/s1	IGGVQTVKZINOGK-NOYMGPGASA-N	Plasticizer metabolites
Mono-methyl phthalate	MMP	COC(=O)C1=CC=CC=C1C(=O)O	C9H8O4		180.042	203.031	[M+Na]+	146.13	0.124499	0.0851974	InChI=1S/C9H8O4/c1-13-9(12)7-5-3-2-4-6(7)8(10)11/h2-5H,1H3,(H,10,11)	FNJSWIPFHMKRAT-UHFFFAOYSA-N	Plasticizer metabolites
Mono-methyl phthalate	MMP	COC(=O)C1=CC=CC=C1C(=O)O	C9H8O4		180.042	179.035	[M-H]-	137.006	0.061074	0.044577	InChI=1S/C9H8O4/c1-13-9(12)7-5-3-2-4-6(7)8(10)11/h2-5H,1H3,(H,10,11)	FNJSWIPFHMKRAT-UHFFFAOYSA-N	Plasticizer metabolites
Mono-n-butyl phthalate	MnBP	CCCCOC(=O)C1=CC=CC=C1C(=O)O	C12H14O4		222.089	245.078	[M+Na]+	163.942	0.0288675	0.0176084	InChI=1S/C12H14O4/c1-2-3-8-16-12(15)10-7-5-4-6-9(10)11(13)14/h4-7H,2-3,8H2,1H3,(H,13,14)	YZBOVSFWWNVKRJ-UHFFFAOYSA-N	Plasticizer metabolites
Mono-n-butyl phthalate	MnBP	CCCCOC(=O)C1=CC=CC=C1C(=O)O	C12H14O4		222.089	221.082	[M-H]-	151.112	0.04272	0.0282704	InChI=1S/C12H14O4/c1-2-3-8-16-12(15)10-7-5-4-6-9(10)11(13)14/h4-7H,2-3,8H2,1H3,(H,13,14)	YZBOVSFWWNVKRJ-UHFFFAOYSA-N	Plasticizer metabolites
N-ethylperfluorooctane sulfonamido acetic acid	N-EtFOSAA	CCN(CC(=O)O)S(=O)(=O)C(C(C(C(C(C(C(C(F)(F)F)(F)F)(F)F)(F)F)(F)F)(F)F)(F)F)(F)F	C12H8F17NO4S		584.99	583.983	[M-H]-	196.806	0.0591608	0.0300605	InChI=1S/C12H8F17NO4S/c1-2-30(3-4(31)32)35(33,34)12(28,29)10(23,24)8(19,20)6(15,16)5(13,14)7(17,18)9(21,22)11(25,26)27/h2-3H2,1H3,(H,31,32)	CKRXVVGETMYFIO-UHFFFAOYSA-N	PFAS
N-ethylperfluorooctane sulfonamido acetic acid	N-EtFOSAA	CCN(CC(=O)O)S(=O)(=O)C(C(C(C(C(C(C(C(F)(F)F)(F)F)(F)F)(F)F)(F)F)(F)F)(F)F)(F)F	C12H8F17NO4S		584.99	1168.97	[2M-H]-	283.556	0.0648074	0.0228552	InChI=1S/C12H8F17NO4S/c1-2-30(3-4(31)32)35(33,34)12(28,29)10(23,24)8(19,20)6(15,16)5(13,14)7(17,18)9(21,22)11(25,26)27/h2-3H2,1H3,(H,31,32)	CKRXVVGETMYFIO-UHFFFAOYSA-N	PFAS
N-ethylperfluorooctanesulfonamide	N-EtFOSA	CCNS(=O)(=O)C(C(C(C(C(C(C(C(F)(F)F)(F)F)(F)F)(F)F)(F)F)(F)F)(F)F)(F)F	C10H6F17NO2S		526.985	525.978	[M-H]-	178.418	0.0258199	0.0144716	InChI=1S/C10H6F17NO2S/c1-2-28-31(29,30)10(26,27)8(21,22)6(17,18)4(13,14)3(11,12)5(15,16)7(19,20)9(23,24)25/h28H,2H2,1H3	CCEKAJIANROZEO-UHFFFAOYSA-N	PFAS
N-Methylperfluorooctane sulfonamide	N-MeFOSA	CNS(=O)(=O)C(C(C(C(C(C(C(C(F)(F)F)(F)F)(F)F)(F)F)(F)F)(F)F)(F)F)(F)F	C9H4F17NO2S		512.969	511.962	[M-H]-	173.97	0.0262996	0.0151173	InChI=1S/C9H4F17NO2S/c1-27-30(28,29)9(25,26)7(20,21)5(16,17)3(12,13)2(10,11)4(14,15)6(18,19)8(22,23)24/h27H,1H3	SRMWNTGHXHOWBT-UHFFFAOYSA-N	PFAS
N-methylperfluorooctane sulfonamido acetic acid	N-MeFOSAA	CN(CC(=O)O)S(=O)(=O)C(C(C(C(C(C(C(C(F)(F)F)(F)F)(F)F)(F)F)(F)F)(F)F)(F)F)(F)F	C11H6F17NO4S		570.975	569.967	[M-H]-	193.166	0.030957	0.0160261	InChI=1S/C11H6F17NO4S/c1-29(2-3(30)31)34(32,33)11(27,28)9(22,23)7(18,19)5(14,15)4(12,13)6(16,17)8(20,21)10(24,25)26/h2H2,1H3,(H,30,31)	QNDHIRFIMVNHBN-UHFFFAOYSA-N	PFAS
N-methylperfluorooctane sulfonamido acetic acid	N-MeFOSAA	CN(CC(=O)O)S(=O)(=O)C(C(C(C(C(C(C(C(F)(F)F)(F)F)(F)F)(F)F)(F)F)(F)F)(F)F)(F)F	C11H6F17NO4S		570.975	1140.94	[2M-H]-	275.838	0.104363	0.0378349	InChI=1S/C11H6F17NO4S/c1-29(2-3(30)31)34(32,33)11(27,28)9(22,23)7(18,19)5(14,15)4(12,13)6(16,17)8(20,21)10(24,25)26/h2H2,1H3,(H,30,31)	QNDHIRFIMVNHBN-UHFFFAOYSA-N	PFAS
Para-hydroxy triphenyl phosphate	pOH-TPP	C1=CC=C(C=C1)OP(=O)(OC2=CC=CC=C2)OC3=CC=C(C=C3)O	C18H15O5P		342.066	341.058	[M-H]-	181.904	0.0483046	0.026555	InChI=1S/C18H15O5P/c19-15-11-13-18(14-12-15)23-24(20,21-16-7-3-1-4-8-16)22-17-9-5-2-6-10-17/h1-14,19H	NOPNBQOZUKISRP-UHFFFAOYSA-N	OP metabolites
Para-hydroxy triphenyl phosphate	pOH-TPP	C1=CC=C(C=C1)OP(=O)(OC2=CC=CC=C2)OC3=CC=C(C=C3)O	C18H15O5P		342.066	683.124	[2M-H]-	251.298	0.238537	0.094922	InChI=1S/C18H15O5P/c19-15-11-13-18(14-12-15)23-24(20,21-16-7-3-1-4-8-16)22-17-9-5-2-6-10-17/h1-14,19H	NOPNBQOZUKISRP-UHFFFAOYSA-N	OP metabolites
Para-hydroxy triphenyl phosphate	pOH-TPP	C1=CC=C(C=C1)OP(=O)(OC2=CC=CC=C2)OC3=CC=C(C=C3)O	C18H15O5P		342.066	343.073	[M+H]+	178.115	0.0130384	0.00732022	InChI=1S/C18H15O5P/c19-15-11-13-18(14-12-15)23-24(20,21-16-7-3-1-4-8-16)22-17-9-5-2-6-10-17/h1-14,19H	NOPNBQOZUKISRP-UHFFFAOYSA-N	OP metabolites
Para-hydroxy triphenyl phosphate	pOH-TPP	C1=CC=C(C=C1)OP(=O)(OC2=CC=CC=C2)OC3=CC=C(C=C3)O	C18H15O5P		342.066	365.055	[M+Na]+	188.498	0.0370135	0.019636	InChI=1S/C18H15O5P/c19-15-11-13-18(14-12-15)23-24(20,21-16-7-3-1-4-8-16)22-17-9-5-2-6-10-17/h1-14,19H	NOPNBQOZUKISRP-UHFFFAOYSA-N	OP metabolites
Para-hydroxy triphenyl phosphate	pOH-TPP	C1=CC=C(C=C1)OP(=O)(OC2=CC=CC=C2)OC3=CC=C(C=C3)O	C18H15O5P		342.066	685.139	[2M+H]+	248.962	0.0804363	0.0323087	InChI=1S/C18H15O5P/c19-15-11-13-18(14-12-15)23-24(20,21-16-7-3-1-4-8-16)22-17-9-5-2-6-10-17/h1-14,19H	NOPNBQOZUKISRP-UHFFFAOYSA-N	OP metabolites
Para-hydroxy triphenyl phosphate	pOH-TPP	C1=CC=C(C=C1)OP(=O)(OC2=CC=CC=C2)OC3=CC=C(C=C3)O	C18H15O5P		342.066	707.121	[2M+Na]+	254.808	0.0311448	0.0122229	InChI=1S/C18H15O5P/c19-15-11-13-18(14-12-15)23-24(20,21-16-7-3-1-4-8-16)22-17-9-5-2-6-10-17/h1-14,19H	NOPNBQOZUKISRP-UHFFFAOYSA-N	OP metabolites
perfluorobutanesulfonic acid	PFBS	C(C(C(F)(F)S(=O)(=O)O)(F)F)(C(F)(F)F)(F)F	C4HF9O3S		299.95	298.943	[M-H]-	133.275	0.0264575	0.0198518	InChI=1S/C4HF9O3S/c5-1(6,3(9,10)11)2(7,8)4(12,13)17(14,15)16/h(H,14,15,16)	JGTNAGYHADQMCM-UHFFFAOYSA-N	PFAS
perfluorobutanesulfonic acid	PFBS	C(C(C(F)(F)S(=O)(=O)O)(F)F)(C(F)(F)F)(F)F	C4HF9O3S		299.95	598.893	[2M-H]-	196.884	0.141174	0.071704	InChI=1S/C4HF9O3S/c5-1(6,3(9,10)11)2(7,8)4(12,13)17(14,15)16/h(H,14,15,16)	JGTNAGYHADQMCM-UHFFFAOYSA-N	PFAS
perfluorodecane sulfonic acid	PFDS	C(C(C(C(C(C(F)(F)S(=O)(=O)O)(F)F)(F)F)(F)F)(F)F)(C(C(C(C(F)(F)F)(F)F)(F)F)(F)F)(F)F	C10HF21O3S		599.931	598.924	[M-H]-	186.912	0.0725948	0.038839	InChI=1S/C10HF21O3S/c11-1(12,3(15,16)5(19,20)7(23,24)9(27,28)29)2(13,14)4(17,18)6(21,22)8(25,26)10(30,31)35(32,33)34/h(H,32,33,34)	HYWZIAVPBSTISZ-UHFFFAOYSA-N	PFAS
Perfluorodecylphosponic acid	PFDPA	C(C(C(C(C(C(F)(F)P(=O)(O)O)(F)F)(F)F)(F)F)(F)F)(C(C(C(C(F)(F)F)(F)F)(F)F)(F)F)(F)F	C10H2F21O3P		599.941	598.933	[M-H]-	188.252	0.005	0.00265601	InChI=1S/C10H2F21O3P/c11-1(12,3(15,16)5(19,20)7(23,24)9(27,28)29)2(13,14)4(17,18)6(21,22)8(25,26)10(30,31)35(32,33)34/h(H2,32,33,34)	CTGNCBOZEMOASL-UHFFFAOYSA-N	PFAS
perfluorohexanesulfonic acid	PFHxS	C(C(C(C(F)(F)S(=O)(=O)O)(F)F)(F)F)(C(C(F)(F)F)(F)F)(F)F	C6HF13O3S		399.944	398.937	[M-H]-	150.805	0.0550757	0.0365211	InChI=1S/C6HF13O3S/c7-1(8,3(11,12)5(15,16)17)2(9,10)4(13,14)6(18,19)23(20,21)22/h(H,20,21,22)	QZHDEAJFRJCDMF-UHFFFAOYSA-N	PFAS
perfluorohexanesulfonic acid	PFHxS	C(C(C(C(F)(F)S(=O)(=O)O)(F)F)(F)F)(C(C(F)(F)F)(F)F)(F)F	C6HF13O3S		399.944	798.88	[2M-H]-	228.662	0.0954987	0.0417641	InChI=1S/C6HF13O3S/c7-1(8,3(11,12)5(15,16)17)2(9,10)4(13,14)6(18,19)23(20,21)22/h(H,20,21,22)	QZHDEAJFRJCDMF-UHFFFAOYSA-N	PFAS
Perfluoro-n-butanoic acid	PFBA	C(=O)(C(C(C(F)(F)F)(F)F)(F)F)O	C4HF7O2		213.987	168.989	[M-H-CO2]-	109.528	0.0973139	0.0888484	InChI=1S/C4HF7O2/c5-2(6,1(12)13)3(7,8)4(9,10)11/h(H,12,13)	YPJUNDFVDDCYIH-UHFFFAOYSA-N	PFAS
Perfluoro-n-decanoic acid	PFDA	C(=O)(C(C(C(C(C(C(C(C(C(F)(F)F)(F)F)(F)F)(F)F)(F)F)(F)F)(F)F)(F)F)(F)F)O	C10HF19O2		513.967	512.96	[M-H]-	174.29	0.0787401	0.0451776	InChI=1S/C10HF19O2/c11-2(12,1(30)31)3(13,14)4(15,16)5(17,18)6(19,20)7(21,22)8(23,24)9(25,26)10(27,28)29/h(H,30,31)	PCIUEQPBYFRTEM-UHFFFAOYSA-N	PFAS
Perfluoro-n-decanoic acid	PFDA	C(=O)(C(C(C(C(C(C(C(C(C(F)(F)F)(F)F)(F)F)(F)F)(F)F)(F)F)(F)F)(F)F)(F)F)O	C10HF19O2		513.967	1026.93	[2M-H]-	254.238	0.139613	0.0549142	InChI=1S/C10HF19O2/c11-2(12,1(30)31)3(13,14)4(15,16)5(17,18)6(19,20)7(21,22)8(23,24)9(25,26)10(27,28)29/h(H,30,31)	PCIUEQPBYFRTEM-UHFFFAOYSA-N	PFAS
Perfluoro-n-decanoic acid	PFDA	C(=O)(C(C(C(C(C(C(C(C(C(F)(F)F)(F)F)(F)F)(F)F)(F)F)(F)F)(F)F)(F)F)(F)F)O	C10HF19O2		513.967	468.97	[M-H-CO2]-	155.63	0.0738241	0.0474357	InChI=1S/C10HF19O2/c11-2(12,1(30)31)3(13,14)4(15,16)5(17,18)6(19,20)7(21,22)8(23,24)9(25,26)10(27,28)29/h(H,30,31)	PCIUEQPBYFRTEM-UHFFFAOYSA-N	PFAS
Perfluoro-n-dodecanoic acid	PFDoA	C(=O)(C(C(C(C(C(C(C(C(C(C(C(F)(F)F)(F)F)(F)F)(F)F)(F)F)(F)F)(F)F)(F)F)(F)F)(F)F)(F)F)O	C12HF23O2		613.961	612.954	[M-H]-	192.164	0.0944987	0.0491761	InChI=1S/C12HF23O2/c13-2(14,1(36)37)3(15,16)4(17,18)5(19,20)6(21,22)7(23,24)8(25,26)9(27,28)10(29,30)11(31,32)12(33,34)35/h(H,36,37)	CXGONMQFMIYUJR-UHFFFAOYSA-N	PFAS
Perfluoro-n-dodecanoic acid	PFDoA	C(=O)(C(C(C(C(C(C(C(C(C(C(C(F)(F)F)(F)F)(F)F)(F)F)(F)F)(F)F)(F)F)(F)F)(F)F)(F)F)(F)F)O	C12HF23O2		613.961	1226.91	[2M-H]-	278.803	0.186793	0.0669984	InChI=1S/C12HF23O2/c13-2(14,1(36)37)3(15,16)4(17,18)5(19,20)6(21,22)7(23,24)8(25,26)9(27,28)10(29,30)11(31,32)12(33,34)35/h(H,36,37)	CXGONMQFMIYUJR-UHFFFAOYSA-N	PFAS
Perfluoro-n-dodecanoic acid	PFDoA	C(=O)(C(C(C(C(C(C(C(C(C(C(C(F)(F)F)(F)F)(F)F)(F)F)(F)F)(F)F)(F)F)(F)F)(F)F)(F)F)(F)F)O	C12HF23O2		613.961	568.964	[M-H-CO2]-	172.252	0.0834865	0.0484677	InChI=1S/C12HF23O2/c13-2(14,1(36)37)3(15,16)4(17,18)5(19,20)6(21,22)7(23,24)8(25,26)9(27,28)10(29,30)11(31,32)12(33,34)35/h(H,36,37)	CXGONMQFMIYUJR-UHFFFAOYSA-N	PFAS
Perfluoro-n-heptanoic acid	PFHpA	C(=O)(C(C(C(C(C(C(F)(F)F)(F)F)(F)F)(F)F)(F)F)(F)F)O	C7HF13O2		363.977	362.97	[M-H]-	147.61	0.143527	0.0972339	InChI=1S/C7HF13O2/c8-2(9,1(21)22)3(10,11)4(12,13)5(14,15)6(16,17)7(18,19)20/h(H,21,22)	ZWBAMYVPMDSJGQ-UHFFFAOYSA-N	PFAS
Perfluoro-n-heptanoic acid	PFHpA	C(=O)(C(C(C(C(C(C(F)(F)F)(F)F)(F)F)(F)F)(F)F)(F)F)O	C7HF13O2		363.977	726.947	[2M-H]-	211.585	0.151548	0.0716249	InChI=1S/C7HF13O2/c8-2(9,1(21)22)3(10,11)4(12,13)5(14,15)6(16,17)7(18,19)20/h(H,21,22)	ZWBAMYVPMDSJGQ-UHFFFAOYSA-N	PFAS
Perfluoro-n-heptanoic acid	PFHpA	C(=O)(C(C(C(C(C(C(F)(F)F)(F)F)(F)F)(F)F)(F)F)(F)F)O	C7HF13O2		363.977	318.98	[M-H-CO2]-	132.296	0.074027	0.0559556	InChI=1S/C7HF13O2/c8-2(9,1(21)22)3(10,11)4(12,13)5(14,15)6(16,17)7(18,19)20/h(H,21,22)	ZWBAMYVPMDSJGQ-UHFFFAOYSA-N	PFAS
Perfluoro-n-hexadecanoic acid	PFHxDA	C(=O)(C(C(C(C(C(C(C(C(C(C(C(C(C(C(C(F)(F)F)(F)F)(F)F)(F)F)(F)F)(F)F)(F)F)(F)F)(F)F)(F)F)(F)F)(F)F)(F)F)(F)F)(F)F)O	C16HF31O2		813.948	812.941	[M-H]-	227.34	0.0469042	0.0206317	InChI=1S/C16HF31O2/c17-2(18,1(48)49)3(19,20)4(21,22)5(23,24)6(25,26)7(27,28)8(29,30)9(31,32)10(33,34)11(35,36)12(37,38)13(39,40)14(41,42)15(43,44)16(45,46)47/h(H,48,49)	OJMBMWRMTMHMSZ-UHFFFAOYSA-N	PFAS
Perfluoro-n-hexadecanoic acid	PFHxDA	C(=O)(C(C(C(C(C(C(C(C(C(C(C(C(C(C(C(F)(F)F)(F)F)(F)F)(F)F)(F)F)(F)F)(F)F)(F)F)(F)F)(F)F)(F)F)(F)F)(F)F)(F)F)(F)F)O	C16HF31O2		813.948	1626.89	[2M-H]-	325.426	0.180776	0.0555506	InChI=1S/C16HF31O2/c17-2(18,1(48)49)3(19,20)4(21,22)5(23,24)6(25,26)7(27,28)8(29,30)9(31,32)10(33,34)11(35,36)12(37,38)13(39,40)14(41,42)15(43,44)16(45,46)47/h(H,48,49)	OJMBMWRMTMHMSZ-UHFFFAOYSA-N	PFAS
Perfluoro-n-hexadecanoic acid	PFHxDA	C(=O)(C(C(C(C(C(C(C(C(C(C(C(C(C(C(C(F)(F)F)(F)F)(F)F)(F)F)(F)F)(F)F)(F)F)(F)F)(F)F)(F)F)(F)F)(F)F)(F)F)(F)F)(F)F)O	C16HF31O2		813.948	768.951	[M-H-CO2]-	204.504	0.0750333	0.0366904	InChI=1S/C16HF31O2/c17-2(18,1(48)49)3(19,20)4(21,22)5(23,24)6(25,26)7(27,28)8(29,30)9(31,32)10(33,34)11(35,36)12(37,38)13(39,40)14(41,42)15(43,44)16(45,46)47/h(H,48,49)	OJMBMWRMTMHMSZ-UHFFFAOYSA-N	PFAS
Perfluoro-n-hexanoic acid	PFHxA	C(=O)(C(C(C(C(C(F)(F)F)(F)F)(F)F)(F)F)(F)F)O	C6HF11O2		313.98	626.953	[2M-H]-	195.936	0.071624	0.0365548	InChI=1S/C6HF11O2/c7-2(8,1(18)19)3(9,10)4(11,12)5(13,14)6(15,16)17/h(H,18,19)	PXUULQAPEKKVAH-UHFFFAOYSA-N	PFAS
Perfluoro-n-hexanoic acid	PFHxA	C(=O)(C(C(C(C(C(F)(F)F)(F)F)(F)F)(F)F)(F)F)O	C6HF11O2		313.98	268.983	[M-H-CO2]-	124.472	0.0340343	0.0273428	InChI=1S/C6HF11O2/c7-2(8,1(18)19)3(9,10)4(11,12)5(13,14)6(15,16)17/h(H,18,19)	PXUULQAPEKKVAH-UHFFFAOYSA-N	PFAS
Perfluoro-n-nonanoic acid	PFNA	C(=O)(C(C(C(C(C(C(C(C(F)(F)F)(F)F)(F)F)(F)F)(F)F)(F)F)(F)F)(F)F)O	C9HF17O2		463.971	462.963	[M-H]-	165.062	0.111221	0.067381	InChI=1S/C9HF17O2/c10-2(11,1(27)28)3(12,13)4(14,15)5(16,17)6(18,19)7(20,21)8(22,23)9(24,25)26/h(H,27,28)	UZUFPBIDKMEQEQ-UHFFFAOYSA-N	PFAS
Perfluoro-n-nonanoic acid	PFNA	C(=O)(C(C(C(C(C(C(C(C(F)(F)F)(F)F)(F)F)(F)F)(F)F)(F)F)(F)F)(F)F)O	C9HF17O2		463.971	926.934	[2M-H]-	240.714	0.146048	0.0606728	InChI=1S/C9HF17O2/c10-2(11,1(27)28)3(12,13)4(14,15)5(16,17)6(18,19)7(20,21)8(22,23)9(24,25)26/h(H,27,28)	UZUFPBIDKMEQEQ-UHFFFAOYSA-N	PFAS
Perfluoro-n-nonanoic acid	PFNA	C(=O)(C(C(C(C(C(C(C(C(F)(F)F)(F)F)(F)F)(F)F)(F)F)(F)F)(F)F)(F)F)O	C9HF17O2		463.971	418.973	[M-H-CO2]-	147.052	0.0449444	0.0305636	InChI=1S/C9HF17O2/c10-2(11,1(27)28)3(12,13)4(14,15)5(16,17)6(18,19)7(20,21)8(22,23)9(24,25)26/h(H,27,28)	UZUFPBIDKMEQEQ-UHFFFAOYSA-N	PFAS
Perfluoro-n-octadecanoic acid	PFODA	C(=O)(C(C(C(C(C(C(C(C(C(C(C(C(C(C(C(C(C(F)(F)F)(F)F)(F)F)(F)F)(F)F)(F)F)(F)F)(F)F)(F)F)(F)F)(F)F)(F)F)(F)F)(F)F)(F)F)(F)F)(F)F)O	C18HF35O2		913.942	912.935	[M-H]-	243.534	0.0522494	0.0214547	InChI=1S/C18HF35O2/c19-2(20,1(54)55)3(21,22)4(23,24)5(25,26)6(27,28)7(29,30)8(31,32)9(33,34)10(35,36)11(37,38)12(39,40)13(41,42)14(43,44)15(45,46)16(47,48)17(49,50)18(51,52)53/h(H,54,55)	ZTSDOGSKTICNPQ-UHFFFAOYSA-N	PFAS
Perfluoro-n-octadecanoic acid	PFODA	C(=O)(C(C(C(C(C(C(C(C(C(C(C(C(C(C(C(C(C(F)(F)F)(F)F)(F)F)(F)F)(F)F)(F)F)(F)F)(F)F)(F)F)(F)F)(F)F)(F)F)(F)F)(F)F)(F)F)(F)F)(F)F)O	C18HF35O2		913.942	868.945	[M-H-CO2]-	220.148	0.0496991	0.0225753	InChI=1S/C18HF35O2/c19-2(20,1(54)55)3(21,22)4(23,24)5(25,26)6(27,28)7(29,30)8(31,32)9(33,34)10(35,36)11(37,38)12(39,40)13(41,42)14(43,44)15(45,46)16(47,48)17(49,50)18(51,52)53/h(H,54,55)	ZTSDOGSKTICNPQ-UHFFFAOYSA-N	PFAS
Perfluoro-n-octanoic acid	PFOA	C(=O)(C(C(C(C(C(C(C(F)(F)F)(F)F)(F)F)(F)F)(F)F)(F)F)(F)F)O	C8HF15O2		413.974	412.966	[M-H]-	156.368	0.0872926	0.0558251	InChI=1S/C8HF15O2/c9-2(10,1(24)25)3(11,12)4(13,14)5(15,16)6(17,18)7(19,20)8(21,22)23/h(H,24,25)	SNGREZUHAYWORS-UHFFFAOYSA-N	PFAS
Perfluoro-n-octanoic acid	PFOA	C(=O)(C(C(C(C(C(C(C(F)(F)F)(F)F)(F)F)(F)F)(F)F)(F)F)(F)F)O	C8HF15O2		413.974	826.94	[2M-H]-	226.575	0.083865	0.0370142	InChI=1S/C8HF15O2/c9-2(10,1(24)25)3(11,12)4(13,14)5(15,16)6(17,18)7(19,20)8(21,22)23/h(H,24,25)	SNGREZUHAYWORS-UHFFFAOYSA-N	PFAS
Perfluoro-n-octanoic acid	PFOA	C(=O)(C(C(C(C(C(C(C(F)(F)F)(F)F)(F)F)(F)F)(F)F)(F)F)(F)F)O	C8HF15O2		413.974	368.977	[M-H-CO2]-	139.444	0.0723187	0.0518622	InChI=1S/C8HF15O2/c9-2(10,1(24)25)3(11,12)4(13,14)5(15,16)6(17,18)7(19,20)8(21,22)23/h(H,24,25)	SNGREZUHAYWORS-UHFFFAOYSA-N	PFAS
Perfluoro-n-tetradecanoic acid	PFTeDA	C(=O)(C(C(C(C(C(C(C(C(C(C(C(C(C(F)(F)F)(F)F)(F)F)(F)F)(F)F)(F)F)(F)F)(F)F)(F)F)(F)F)(F)F)(F)F)(F)F)O	C14HF27O2		713.955	712.947	[M-H]-	209.912	0.0637966	0.030392	InChI=1S/C14HF27O2/c15-2(16,1(42)43)3(17,18)4(19,20)5(21,22)6(23,24)7(25,26)8(27,28)9(29,30)10(31,32)11(33,34)12(35,36)13(37,38)14(39,40)41/h(H,42,43)	RUDINRUXCKIXAJ-UHFFFAOYSA-N	PFAS
Perfluoro-n-tetradecanoic acid	PFTeDA	C(=O)(C(C(C(C(C(C(C(C(C(C(C(C(C(F)(F)F)(F)F)(F)F)(F)F)(F)F)(F)F)(F)F)(F)F)(F)F)(F)F)(F)F)(F)F)(F)F)O	C14HF27O2		713.955	1426.9	[2M-H]-	302.018	0.142021	0.0470241	InChI=1S/C14HF27O2/c15-2(16,1(42)43)3(17,18)4(19,20)5(21,22)6(23,24)7(25,26)8(27,28)9(29,30)10(31,32)11(33,34)12(35,36)13(37,38)14(39,40)41/h(H,42,43)	RUDINRUXCKIXAJ-UHFFFAOYSA-N	PFAS
Perfluoro-n-tetradecanoic acid	PFTeDA	C(=O)(C(C(C(C(C(C(C(C(C(C(C(C(C(F)(F)F)(F)F)(F)F)(F)F)(F)F)(F)F)(F)F)(F)F)(F)F)(F)F)(F)F)(F)F)(F)F)O	C14HF27O2		713.955	668.957	[M-H-CO2]-	188.43	0.0484768	0.0257267	InChI=1S/C14HF27O2/c15-2(16,1(42)43)3(17,18)4(19,20)5(21,22)6(23,24)7(25,26)8(27,28)9(29,30)10(31,32)11(33,34)12(35,36)13(37,38)14(39,40)41/h(H,42,43)	RUDINRUXCKIXAJ-UHFFFAOYSA-N	PFAS
Perfluoro-n-tridecanoic acid	PFTrDA	C(=O)(C(C(C(C(C(C(C(C(C(C(C(C(F)(F)F)(F)F)(F)F)(F)F)(F)F)(F)F)(F)F)(F)F)(F)F)(F)F)(F)F)(F)F)O	C13HF25O2		663.958	662.95	[M-H]-	201.052	0.0356371	0.0177253	InChI=1S/C13HF25O2/c14-2(15,1(39)40)3(16,17)4(18,19)5(20,21)6(22,23)7(24,25)8(26,27)9(28,29)10(30,31)11(32,33)12(34,35)13(36,37)38/h(H,39,40)	LVDGGZAZAYHXEY-UHFFFAOYSA-N	PFAS
Perfluoro-n-tridecanoic acid	PFTrDA	C(=O)(C(C(C(C(C(C(C(C(C(C(C(C(F)(F)F)(F)F)(F)F)(F)F)(F)F)(F)F)(F)F)(F)F)(F)F)(F)F)(F)F)(F)F)O	C13HF25O2		663.958	1326.91	[2M-H]-	290.635	0.0602771	0.0207398	InChI=1S/C13HF25O2/c14-2(15,1(39)40)3(16,17)4(18,19)5(20,21)6(22,23)7(24,25)8(26,27)9(28,29)10(30,31)11(32,33)12(34,35)13(36,37)38/h(H,39,40)	LVDGGZAZAYHXEY-UHFFFAOYSA-N	PFAS
Perfluoro-n-tridecanoic acid	PFTrDA	C(=O)(C(C(C(C(C(C(C(C(C(C(C(C(F)(F)F)(F)F)(F)F)(F)F)(F)F)(F)F)(F)F)(F)F)(F)F)(F)F)(F)F)(F)F)O	C13HF25O2		663.958	618.961	[M-H-CO2]-	180.304	0.0391152	0.021694	InChI=1S/C13HF25O2/c14-2(15,1(39)40)3(16,17)4(18,19)5(20,21)6(22,23)7(24,25)8(26,27)9(28,29)10(30,31)11(32,33)12(34,35)13(36,37)38/h(H,39,40)	LVDGGZAZAYHXEY-UHFFFAOYSA-N	PFAS
Perfluoro-n-undecanoic acid	PFUdA	C(=O)(C(C(C(C(C(C(C(C(C(C(F)(F)F)(F)F)(F)F)(F)F)(F)F)(F)F)(F)F)(F)F)(F)F)(F)F)O	C11HF21O2		563.964	562.957	[M-H]-	182.858	0.0576194	0.0315105	InChI=1S/C11HF21O2/c12-2(13,1(33)34)3(14,15)4(16,17)5(18,19)6(20,21)7(22,23)8(24,25)9(26,27)10(28,29)11(30,31)32/h(H,33,34)	SIDINRCMMRKXGQ-UHFFFAOYSA-N	PFAS
Perfluoro-n-undecanoic acid	PFUdA	C(=O)(C(C(C(C(C(C(C(C(C(C(F)(F)F)(F)F)(F)F)(F)F)(F)F)(F)F)(F)F)(F)F)(F)F)(F)F)O	C11HF21O2		563.964	1126.92	[2M-H]-	266.808	0.115289	0.0432107	InChI=1S/C11HF21O2/c12-2(13,1(33)34)3(14,15)4(16,17)5(18,19)6(20,21)7(22,23)8(24,25)9(26,27)10(28,29)11(30,31)32/h(H,33,34)	SIDINRCMMRKXGQ-UHFFFAOYSA-N	PFAS
Perfluoro-n-undecanoic acid	PFUdA	C(=O)(C(C(C(C(C(C(C(C(C(C(F)(F)F)(F)F)(F)F)(F)F)(F)F)(F)F)(F)F)(F)F)(F)F)(F)F)O	C11HF21O2		563.964	518.967	[M-H-CO2]-	163.838	0.0794984	0.0485226	InChI=1S/C11HF21O2/c12-2(13,1(33)34)3(14,15)4(16,17)5(18,19)6(20,21)7(22,23)8(24,25)9(26,27)10(28,29)11(30,31)32/h(H,33,34)	SIDINRCMMRKXGQ-UHFFFAOYSA-N	PFAS
Perfluorooctane sulfonamide	FOSA	C(C(C(C(C(F)(F)S(=O)(=O)N)(F)F)(F)F)(F)F)(C(C(C(F)(F)F)(F)F)(F)F)(F)F	C8H2F17NO2S		498.953	497.946	[M-H]-	170.134	0.0221736	0.013033	InChI=1S/C8H2F17NO2S/c9-1(10,3(13,14)5(17,18)7(21,22)23)2(11,12)4(15,16)6(19,20)8(24,25)29(26,27)28/h(H2,26,27,28)	RRRXPPIDPYTNJG-UHFFFAOYSA-N	PFAS
perfluorooctylsulfonic acid	PFOS	C(C(C(C(C(F)(F)S(=O)(=O)O)(F)F)(F)F)(F)F)(C(C(C(F)(F)F)(F)F)(F)F)(F)F	C8HF17O3S		499.937	498.93	[M-H]-	168.892	0.0746324	0.0441894	InChI=1S/C8HF17O3S/c9-1(10,3(13,14)5(17,18)7(21,22)23)2(11,12)4(15,16)6(19,20)8(24,25)29(26,27)28/h(H,26,27,28)	YFSUTJLHUFNCNZ-UHFFFAOYSA-N	PFAS
perfluorooctylsulfonic acid	PFOS	C(C(C(C(C(F)(F)S(=O)(=O)O)(F)F)(F)F)(F)F)(C(C(C(F)(F)F)(F)F)(F)F)(F)F	C8HF17O3S		499.937	998.868	[2M-H]-	257.716	0.117175	0.0454667	InChI=1S/C8HF17O3S/c9-1(10,3(13,14)5(17,18)7(21,22)23)2(11,12)4(15,16)6(19,20)8(24,25)29(26,27)28/h(H,26,27,28)	YFSUTJLHUFNCNZ-UHFFFAOYSA-N	PFAS
Perfluoropentanoic acid	PFPeA	C(=O)(C(C(C(C(F)(F)F)(F)F)(F)F)(F)F)O	C5HF9O2		263.983	526.959	[2M-H]-	179.96	0.0979796	0.0544452	InChI=1S/C5HF9O2/c6-2(7,1(15)16)3(8,9)4(10,11)5(12,13)14/h(H,15,16)	CXZGQIAOTKWCDB-UHFFFAOYSA-N	PFAS
Perfluoropentanoic acid	PFPeA	C(=O)(C(C(C(C(F)(F)F)(F)F)(F)F)(F)F)O	C5HF9O2		263.983	218.986	[M-H-CO2]-	116.782	0.055857	0.0478301	InChI=1S/C5HF9O2/c6-2(7,1(15)16)3(8,9)4(10,11)5(12,13)14/h(H,15,16)	CXZGQIAOTKWCDB-UHFFFAOYSA-N	PFAS
p-Nitrophenol		C1=CC(=CC=C1[N+](=O)[O-])O	C6H5NO3		139.027	138.02	[M-H]-	119.784	0.03	0.0250451	InChI=1S/C6H5NO3/c8-6-3-1-5(2-4-6)7(9)10/h1-4,8H	BTJIUGUIPKRLHP-UHFFFAOYSA-N	Other chemicals
Resorcinol bis(diphenyl phosphate)	Fyrolflex RDP	C1=CC=C(C=C1)OP(=O)(OC2=CC=CC=C2)OC3=CC(=CC=C3)OP(=O)(OC4=CC=CC=C4)OC5=CC=CC=C5	C30H24O8P2		574.095	575.102	[M+H]+	228.77	0.0556776	0.0243378	InChI=1S/C30H24O8P2/c31-39(33-25-14-5-1-6-15-25,34-26-16-7-2-8-17-26)37-29-22-13-23-30(24-29)38-40(32,35-27-18-9-3-10-19-27)36-28-20-11-4-12-21-28/h1-24H	OWICEWMBIBPFAH-UHFFFAOYSA-N	organophosphorus flame retardant (OP)
Resorcinol bis(diphenyl phosphate)	Fyrolflex RDP	C1=CC=C(C=C1)OP(=O)(OC2=CC=CC=C2)OC3=CC(=CC=C3)OP(=O)(OC4=CC=CC=C4)OC5=CC=CC=C5	C30H24O8P2		574.095	597.084	[M+Na]+	231.576	0.0298608	0.0128946	InChI=1S/C30H24O8P2/c31-39(33-25-14-5-1-6-15-25,34-26-16-7-2-8-17-26)37-29-22-13-23-30(24-29)38-40(32,35-27-18-9-3-10-19-27)36-28-20-11-4-12-21-28/h1-24H	OWICEWMBIBPFAH-UHFFFAOYSA-N	organophosphorus flame retardant (OP)
Sodium 1H,1H,2H,2H-perfluorooctane sulfonate	6:2 FTS	C(CS(=O)(=O)O)C(C(C(C(C(C(F)(F)F)(F)F)(F)F)(F)F)(F)F)(F)F	C8H5F13O3S		427.975	426.968	[M-H]-	168.472	0.0629153	0.0373447	InChI=1S/C8H5F13O3S/c9-3(10,1-2-25(22,23)24)4(11,12)5(13,14)6(15,16)7(17,18)8(19,20)21/h1-2H2,(H,22,23,24)	VIONGDJUYAYOPU-UHFFFAOYSA-N	PFAS
Sodium 1H,1H,2H,2H-perfluorooctane sulfonate	6:2 FTS	C(CS(=O)(=O)O)C(C(C(C(C(C(F)(F)F)(F)F)(F)F)(F)F)(F)F)(F)F	C8H5F13O3S		427.975	854.943	[2M-H]-	236.238	0.11471	0.0485569	InChI=1S/C8H5F13O3S/c9-3(10,1-2-25(22,23)24)4(11,12)5(13,14)6(15,16)7(17,18)8(19,20)21/h1-2H2,(H,22,23,24)	VIONGDJUYAYOPU-UHFFFAOYSA-N	PFAS
Triamylphosphate	TAP	CCCCCOP(=O)(OCCCCC)OCCCCC	C15H33O4P		308.212	309.219	[M+H]+	183.212	0.0506952	0.0276702	InChI=1S/C15H33O4P/c1-4-7-10-13-17-20(16,18-14-11-8-5-2)19-15-12-9-6-3/h4-15H2,1-3H3	QJAVUVZBMMXBRO-UHFFFAOYSA-N	organophosphorus flame retardant (OP)
Triamylphosphate	TAP	CCCCCOP(=O)(OCCCCC)OCCCCC	C15H33O4P		308.212	331.201	[M+Na]+	199.964	0.0920869	0.0460517	InChI=1S/C15H33O4P/c1-4-7-10-13-17-20(16,18-14-11-8-5-2)19-15-12-9-6-3/h4-15H2,1-3H3	QJAVUVZBMMXBRO-UHFFFAOYSA-N	organophosphorus flame retardant (OP)
Triamylphosphate	TAP	CCCCCOP(=O)(OCCCCC)OCCCCC	C15H33O4P		308.212	617.431	[2M+H]+	262.508	0.353369	0.134613	InChI=1S/C15H33O4P/c1-4-7-10-13-17-20(16,18-14-11-8-5-2)19-15-12-9-6-3/h4-15H2,1-3H3	QJAVUVZBMMXBRO-UHFFFAOYSA-N	organophosphorus flame retardant (OP)
Triamylphosphate	TAP	CCCCCOP(=O)(OCCCCC)OCCCCC	C15H33O4P		308.212	639.413	[2M+Na]+	275.71	0.0761577	0.0276224	InChI=1S/C15H33O4P/c1-4-7-10-13-17-20(16,18-14-11-8-5-2)19-15-12-9-6-3/h4-15H2,1-3H3	QJAVUVZBMMXBRO-UHFFFAOYSA-N	organophosphorus flame retardant (OP)
Tributyl acetylcitrate	ATBC	CCCCOC(=O)CC(CC(=O)OCCCC)(C(=O)OCCCC)OC(=O)C	C20H34O8		402.225	403.233	[M+H]+	199.824	0.231366	0.115785	InChI=1S/C20H34O8/c1-5-8-11-25-17(22)14-20(28-16(4)21,19(24)27-13-10-7-3)15-18(23)26-12-9-6-2/h5-15H2,1-4H3	QZCLKYGREBVARF-UHFFFAOYSA-N	Plasticizers
Tributyl acetylcitrate	ATBC	CCCCOC(=O)CC(CC(=O)OCCCC)(C(=O)OCCCC)OC(=O)C	C20H34O8		402.225	425.215	[M+Na]+	205.768	0.056745	0.0275772	InChI=1S/C20H34O8/c1-5-8-11-25-17(22)14-20(28-16(4)21,19(24)27-13-10-7-3)15-18(23)26-12-9-6-2/h5-15H2,1-4H3	QZCLKYGREBVARF-UHFFFAOYSA-N	Plasticizers
Tributyl acetylcitrate	ATBC	CCCCOC(=O)CC(CC(=O)OCCCC)(C(=O)OCCCC)OC(=O)C	C20H34O8		402.225	827.44	[2M+Na]+	291.524	0.141704	0.048608	InChI=1S/C20H34O8/c1-5-8-11-25-17(22)14-20(28-16(4)21,19(24)27-13-10-7-3)15-18(23)26-12-9-6-2/h5-15H2,1-4H3	QZCLKYGREBVARF-UHFFFAOYSA-N	Plasticizers
Triclosan	TCS	C1=CC(=C(C=C1Cl)O)OC2=C(C=C(C=C2)Cl)Cl	C12H7Cl3O2		287.951	286.944	[M-H]-	158.938	0.0912871	0.0574357	InChI=1S/C12H7Cl3O2/c13-7-1-3-11(9(15)5-7)17-12-4-2-8(14)6-10(12)16/h1-6,16H	XEFQLINVKFYRCS-UHFFFAOYSA-N	Other chemicals
Triethylphosphate	TEP	CCOP(=O)(OCC)OCC	C6H15O4P		182.071	183.078	[M+H]+	132.628	0.0622093	0.0469051	InChI=1S/C6H15O4P/c1-4-8-11(7,9-5-2)10-6-3/h4-6H2,1-3H3	DQWPFSLDHJDLRL-UHFFFAOYSA-N	organophosphorus flame retardant (OP)
Triethylphosphate	TEP	CCOP(=O)(OCC)OCC	C6H15O4P		182.071	205.06	[M+Na]+	150.926	0.112383	0.0744625	InChI=1S/C6H15O4P/c1-4-8-11(7,9-5-2)10-6-3/h4-6H2,1-3H3	DQWPFSLDHJDLRL-UHFFFAOYSA-N	organophosphorus flame retardant (OP)
Triethylphosphate	TEP	CCOP(=O)(OCC)OCC	C6H15O4P		182.071	387.131	[2M+Na]+	192.646	0.220522	0.11447	InChI=1S/C6H15O4P/c1-4-8-11(7,9-5-2)10-6-3/h4-6H2,1-3H3	DQWPFSLDHJDLRL-UHFFFAOYSA-N	organophosphorus flame retardant (OP)
Triisobutyl phosphate	TiBP	CC(C)COP(=O)(OCC(C)C)OCC(C)C	C12H27O4P		266.165	267.172	[M+H]+	165.438	0.229935	0.138985	InChI=1S/C12H27O4P/c1-10(2)7-14-17(13,15-8-11(3)4)16-9-12(5)6/h10-12H,7-9H2,1-6H3	HRKAMJBPFPHCSD-UHFFFAOYSA-N	organophosphorus flame retardant (OP)
Triisobutyl phosphate	TiBP	CC(C)COP(=O)(OCC(C)C)OCC(C)C	C12H27O4P		266.165	289.154	[M+Na]+	183.19	0.0812404	0.0443476	InChI=1S/C12H27O4P/c1-10(2)7-14-17(13,15-8-11(3)4)16-9-12(5)6/h10-12H,7-9H2,1-6H3	HRKAMJBPFPHCSD-UHFFFAOYSA-N	organophosphorus flame retardant (OP)
Triisobutyl phosphate	TiBP	CC(C)COP(=O)(OCC(C)C)OCC(C)C	C12H27O4P		266.165	533.337	[2M+H]+	234.544	0.0896103	0.0382062	InChI=1S/C12H27O4P/c1-10(2)7-14-17(13,15-8-11(3)4)16-9-12(5)6/h10-12H,7-9H2,1-6H3	HRKAMJBPFPHCSD-UHFFFAOYSA-N	organophosphorus flame retardant (OP)
Triisobutyl phosphate	TiBP	CC(C)COP(=O)(OCC(C)C)OCC(C)C	C12H27O4P		266.165	555.319	[2M+Na]+	248.376	0.117813	0.0474335	InChI=1S/C12H27O4P/c1-10(2)7-14-17(13,15-8-11(3)4)16-9-12(5)6/h10-12H,7-9H2,1-6H3	HRKAMJBPFPHCSD-UHFFFAOYSA-N	organophosphorus flame retardant (OP)
tri-m-tolyl phosphate	TMTP	CC1=CC(=CC=C1)OP(=O)(OC2=CC=CC(=C2)C)OC3=CC=CC(=C3)C	C21H21O4P		368.118	369.125	[M+H]+	188.56	0.104163	0.0552415	InChI=1S/C21H21O4P/c1-16-7-4-10-19(13-16)23-26(22,24-20-11-5-8-17(2)14-20)25-21-12-6-9-18(3)15-21/h4-15H,1-3H3	RMLPZKRPSQVRAB-UHFFFAOYSA-N	organophosphorus flame retardant (OP)
tri-m-tolyl phosphate	TMTP	CC1=CC(=CC=C1)OP(=O)(OC2=CC=CC(=C2)C)OC3=CC=CC(=C3)C	C21H21O4P		368.118	391.107	[M+Na]+	198.558	0.117771	0.0593131	InChI=1S/C21H21O4P/c1-16-7-4-10-19(13-16)23-26(22,24-20-11-5-8-17(2)14-20)25-21-12-6-9-18(3)15-21/h4-15H,1-3H3	RMLPZKRPSQVRAB-UHFFFAOYSA-N	organophosphorus flame retardant (OP)
tri-m-tolyl phosphate	TMTP	CC1=CC(=CC=C1)OP(=O)(OC2=CC=CC(=C2)C)OC3=CC=CC(=C3)C	C21H21O4P		368.118	759.225	[2M+Na]+	272.514	0.162419	0.0596003	InChI=1S/C21H21O4P/c1-16-7-4-10-19(13-16)23-26(22,24-20-11-5-8-17(2)14-20)25-21-12-6-9-18(3)15-21/h4-15H,1-3H3	RMLPZKRPSQVRAB-UHFFFAOYSA-N	organophosphorus flame retardant (OP)
Tri-n-butyl phosphate	TnBP	CCCCOP(=O)(OCCCC)OCCCC	C12H27O4P		266.165	267.172	[M+H]+	166.728	0.0571839	0.0342977	InChI=1S/C12H27O4P/c1-4-7-10-14-17(13,15-11-8-5-2)16-12-9-6-3/h4-12H2,1-3H3	STCOOQWBFONSKY-UHFFFAOYSA-N	organophosphorus flame retardant (OP)
Tri-n-butyl phosphate	TnBP	CCCCOP(=O)(OCCCC)OCCCC	C12H27O4P		266.165	289.154	[M+Na]+	184.542	0.0988433	0.0535614	InChI=1S/C12H27O4P/c1-4-7-10-14-17(13,15-11-8-5-2)16-12-9-6-3/h4-12H2,1-3H3	STCOOQWBFONSKY-UHFFFAOYSA-N	organophosphorus flame retardant (OP)
Tri-n-butyl phosphate	TnBP	CCCCOP(=O)(OCCCC)OCCCC	C12H27O4P		266.165	533.337	[2M+H]+	236.49	0.0913783	0.0386394	InChI=1S/C12H27O4P/c1-4-7-10-14-17(13,15-11-8-5-2)16-12-9-6-3/h4-12H2,1-3H3	STCOOQWBFONSKY-UHFFFAOYSA-N	organophosphorus flame retardant (OP)
Tri-n-butyl phosphate	TnBP	CCCCOP(=O)(OCCCC)OCCCC	C12H27O4P		266.165	555.319	[2M+Na]+	250.03	0.115542	0.0462113	InChI=1S/C12H27O4P/c1-4-7-10-14-17(13,15-11-8-5-2)16-12-9-6-3/h4-12H2,1-3H3	STCOOQWBFONSKY-UHFFFAOYSA-N	organophosphorus flame retardant (OP)
TRI-N-HEXYLTRIMELLITATE	THTM	CCCCCCOC(=O)C1=CC(=C(C=C1)C(=O)OCCCCCC)C(=O)OCCCCCC	C27H42O6		462.298	463.305	[M+H]+	236.57	0.256418	0.10839	InChI=1S/C27H42O6/c1-4-7-10-13-18-31-25(28)22-16-17-23(26(29)32-19-14-11-8-5-2)24(21-22)27(30)33-20-15-12-9-6-3/h16-17,21H,4-15,18-20H2,1-3H3	MXHBQKVKHGQWRB-UHFFFAOYSA-N	Plasticizers
TRI-N-HEXYLTRIMELLITATE	THTM	CCCCCCOC(=O)C1=CC(=C(C=C1)C(=O)OCCCCCC)C(=O)OCCCCCC	C27H42O6		462.298	485.287	[M+Na]+	247.49	0.390448	0.157763	InChI=1S/C27H42O6/c1-4-7-10-13-18-31-25(28)22-16-17-23(26(29)32-19-14-11-8-5-2)24(21-22)27(30)33-20-15-12-9-6-3/h16-17,21H,4-15,18-20H2,1-3H3	MXHBQKVKHGQWRB-UHFFFAOYSA-N	Plasticizers
tri-o-tolyl phosphate	TOTP	CC1=CC=CC=C1OP(=O)(OC2=CC=CC=C2C)OC3=CC=CC=C3C	C21H21O4P		368.118	369.125	[M+H]+	182.386	0.0801873	0.0439657	InChI=1S/C21H21O4P/c1-16-10-4-7-13-19(16)23-26(22,24-20-14-8-5-11-17(20)2)25-21-15-9-6-12-18(21)3/h4-15H,1-3H3	YSMRWXYRXBRSND-UHFFFAOYSA-N	organophosphorus flame retardant (OP)
tri-o-tolyl phosphate	TOTP	CC1=CC=CC=C1OP(=O)(OC2=CC=CC=C2C)OC3=CC=CC=C3C	C21H21O4P		368.118	391.107	[M+Na]+	192.426	0.155016	0.0805588	InChI=1S/C21H21O4P/c1-16-10-4-7-13-19(16)23-26(22,24-20-14-8-5-11-17(20)2)25-21-15-9-6-12-18(21)3/h4-15H,1-3H3	YSMRWXYRXBRSND-UHFFFAOYSA-N	organophosphorus flame retardant (OP)
tri-o-tolyl phosphate	TOTP	CC1=CC=CC=C1OP(=O)(OC2=CC=CC=C2C)OC3=CC=CC=C3C	C21H21O4P		368.118	759.225	[2M+Na]+	263.752	0.199549	0.075658	InChI=1S/C21H21O4P/c1-16-10-4-7-13-19(16)23-26(22,24-20-14-8-5-11-17(20)2)25-21-15-9-6-12-18(21)3/h4-15H,1-3H3	YSMRWXYRXBRSND-UHFFFAOYSA-N	organophosphorus flame retardant (OP)
triphenyl phosphate	TPhP	C1=CC=C(C=C1)OP(=O)(OC2=CC=CC=C2)OC3=CC=CC=C3	C18H15O4P		326.071	327.078	[M+H]+	174.74	0.025	0.014307	InChI=1S/C18H15O4P/c19-23(20-16-10-4-1-5-11-16,21-17-12-6-2-7-13-17)22-18-14-8-3-9-15-18/h1-15H	XZZNDPSIHUTMOC-UHFFFAOYSA-N	organophosphorus flame retardant (OP)
triphenyl phosphate	TPhP	C1=CC=C(C=C1)OP(=O)(OC2=CC=CC=C2)OC3=CC=CC=C3	C18H15O4P		326.071	349.06	[M+Na]+	184.956	0.0588784	0.0318337	InChI=1S/C18H15O4P/c19-23(20-16-10-4-1-5-11-16,21-17-12-6-2-7-13-17)22-18-14-8-3-9-15-18/h1-15H	XZZNDPSIHUTMOC-UHFFFAOYSA-N	organophosphorus flame retardant (OP)
triphenyl phosphate	TPhP	C1=CC=C(C=C1)OP(=O)(OC2=CC=CC=C2)OC3=CC=CC=C3	C18H15O4P		326.071	675.131	[2M+Na]+	249.798	0.0645497	0.0258408	InChI=1S/C18H15O4P/c19-23(20-16-10-4-1-5-11-16,21-17-12-6-2-7-13-17)22-18-14-8-3-9-15-18/h1-15H	XZZNDPSIHUTMOC-UHFFFAOYSA-N	organophosphorus flame retardant (OP)
tri-p-tolyl phosphate	TPTP	CC1=CC=C(C=C1)OP(=O)(OC2=CC=C(C=C2)C)OC3=CC=C(C=C3)C	C21H21O4P		368.118	369.125	[M+H]+	190.022	0.0645755	0.0339832	InChI=1S/C21H21O4P/c1-16-4-10-19(11-5-16)23-26(22,24-20-12-6-17(2)7-13-20)25-21-14-8-18(3)9-15-21/h4-15H,1-3H3	BOSMZFBHAYFUBJ-UHFFFAOYSA-N	organophosphorus flame retardant (OP)
tri-p-tolyl phosphate	TPTP	CC1=CC=C(C=C1)OP(=O)(OC2=CC=C(C=C2)C)OC3=CC=C(C=C3)C	C21H21O4P		368.118	391.107	[M+Na]+	200.018	0.0759605	0.0379768	InChI=1S/C21H21O4P/c1-16-4-10-19(11-5-16)23-26(22,24-20-12-6-17(2)7-13-20)25-21-14-8-18(3)9-15-21/h4-15H,1-3H3	BOSMZFBHAYFUBJ-UHFFFAOYSA-N	organophosphorus flame retardant (OP)
tri-p-tolyl phosphate	TPTP	CC1=CC=C(C=C1)OP(=O)(OC2=CC=C(C=C2)C)OC3=CC=C(C=C3)C	C21H21O4P		368.118	759.225	[2M+Na]+	273.744	0.12973	0.0473912	InChI=1S/C21H21O4P/c1-16-4-10-19(11-5-16)23-26(22,24-20-12-6-17(2)7-13-20)25-21-14-8-18(3)9-15-21/h4-15H,1-3H3	BOSMZFBHAYFUBJ-UHFFFAOYSA-N	organophosphorus flame retardant (OP)
tris(1,3-dichloro-2-propyl)phosphate	TDCIPP	C(C(CCl)OP(=O)(OC(CCl)CCl)OC(CCl)CCl)Cl	C9H15Cl6O4P		427.884	428.891	[M+H]+	178.564	0.0221736	0.0124177	InChI=1S/C9H15Cl6O4P/c10-1-7(2-11)17-20(16,18-8(3-12)4-13)19-9(5-14)6-15/h7-9H,1-6H2	ASLWPAWFJZFCKF-UHFFFAOYSA-N	organophosphorus flame retardant (OP)
tris(1,3-dichloro-2-propyl)phosphate	TDCIPP	C(C(CCl)OP(=O)(OC(CCl)CCl)OC(CCl)CCl)Cl	C9H15Cl6O4P		427.884	450.873	[M+Na]+	191.224	0.0616441	0.0322366	InChI=1S/C9H15Cl6O4P/c10-1-7(2-11)17-20(16,18-8(3-12)4-13)19-9(5-14)6-15/h7-9H,1-6H2	ASLWPAWFJZFCKF-UHFFFAOYSA-N	organophosphorus flame retardant (OP)
tris(2,3-dibromopropyl)phosphate	TDBPP	C(C(CBr)Br)OP(=O)(OCC(CBr)Br)OCC(CBr)Br	C9H15Br6O4P		691.581	696.584	[M+H]+	197.246	0.196723	0.0997349	InChI=1S/C9H15Br6O4P/c10-1-7(13)4-17-20(16,18-5-8(14)2-11)19-6-9(15)3-12/h7-9H,1-6H2	PQYJRMFWJJONBO-UHFFFAOYSA-N	organophosphorus flame retardant (OP)
tris(2,3-dibromopropyl)phosphate	TDBPP	C(C(CBr)Br)OP(=O)(OCC(CBr)Br)OCC(CBr)Br	C9H15Br6O4P		691.581	714.57	[M+Na]+	206.372	0.784453	0.380116	InChI=1S/C9H15Br6O4P/c10-1-7(13)4-17-20(16,18-5-8(14)2-11)19-6-9(15)3-12/h7-9H,1-6H2	PQYJRMFWJJONBO-UHFFFAOYSA-N	organophosphorus flame retardant (OP)
tris(2,3-dibromopropyl)phosphate	TDBPP	C(C(CBr)Br)OP(=O)(OCC(CBr)Br)OCC(CBr)Br	C9H15Br6O4P		691.581	716.568	[M+Na]+	206.896	0.0714143	0.034517	InChI=1S/C9H15Br6O4P/c10-1-7(13)4-17-20(16,18-5-8(14)2-11)19-6-9(15)3-12/h7-9H,1-6H2	PQYJRMFWJJONBO-UHFFFAOYSA-N	organophosphorus flame retardant (OP)
tris(2-butoxyethyl) phosphate	TBOEP	CCCCOCCOP(=O)(OCCOCCCC)OCCOCCCC	C18H39O7P		398.243	399.251	[M+H]+	196.442	0.178101	0.0906635	InChI=1S/C18H39O7P/c1-4-7-10-20-13-16-23-26(19,24-17-14-21-11-8-5-2)25-18-15-22-12-9-6-3/h4-18H2,1-3H3	WTLBZVNBAKMVDP-UHFFFAOYSA-N	organophosphorus flame retardant (OP)
tris(2-butoxyethyl) phosphate	TBOEP	CCCCOCCOP(=O)(OCCOCCCC)OCCOCCCC	C18H39O7P		398.243	421.233	[M+Na]+	199.36	0.114891	0.05763	InChI=1S/C18H39O7P/c1-4-7-10-20-13-16-23-26(19,24-17-14-21-11-8-5-2)25-18-15-22-12-9-6-3/h4-18H2,1-3H3	WTLBZVNBAKMVDP-UHFFFAOYSA-N	organophosphorus flame retardant (OP)
tris(2-chloroethyl) phosphate	TCEP	C(CCl)OP(=O)(OCCCl)OCCCl	C6H12Cl3O4P		283.954	284.961	[M+H]+	151.314	0.0466905	0.0308567	InChI=1S/C6H12Cl3O4P/c7-1-4-11-14(10,12-5-2-8)13-6-3-9/h1-6H2	HQUQLFOMPYWACS-UHFFFAOYSA-N	organophosphorus flame retardant (OP)
tris(2-chloroethyl) phosphate	TCEP	C(CCl)OP(=O)(OCCCl)OCCCl	C6H12Cl3O4P		283.954	306.943	[M+Na]+	161.386	0.0776531	0.0481164	InChI=1S/C6H12Cl3O4P/c7-1-4-11-14(10,12-5-2-8)13-6-3-9/h1-6H2	HQUQLFOMPYWACS-UHFFFAOYSA-N	organophosphorus flame retardant (OP)
Tris(2-chloroisopropyl)phosphate	TCIPP	CC(CCl)OP(=O)(OC(C)CCl)OC(C)CCl	C9H18Cl3O4P		326.001	327.008	[M+H]+	161.658	0.0973139	0.0601974	InChI=1S/C9H18Cl3O4P/c1-7(4-10)14-17(13,15-8(2)5-11)16-9(3)6-12/h7-9H,4-6H2,1-3H3	KVMPUXDNESXNOH-UHFFFAOYSA-N	organophosphorus flame retardant (OP)
Tris(2-chloroisopropyl)phosphate	TCIPP	CC(CCl)OP(=O)(OC(C)CCl)OC(C)CCl	C9H18Cl3O4P		326.001	348.99	[M+Na]+	171.334	0.0497996	0.0290658	InChI=1S/C9H18Cl3O4P/c1-7(4-10)14-17(13,15-8(2)5-11)16-9(3)6-12/h7-9H,4-6H2,1-3H3	KVMPUXDNESXNOH-UHFFFAOYSA-N	organophosphorus flame retardant (OP)
tris(2-ethylhexyl)phosphate	TEHP	CCCCC(CC)COP(=O)(OCC(CC)CCCC)OCC(CC)CCCC	C24H51O4P		434.352	435.36	[M+H]+	219.146	0.132401	0.0604168	InChI=1S/C24H51O4P/c1-7-13-16-22(10-4)19-26-29(25,27-20-23(11-5)17-14-8-2)28-21-24(12-6)18-15-9-3/h22-24H,7-21H2,1-6H3	GTVWRXDRKAHEAD-UHFFFAOYSA-N	organophosphorus flame retardant (OP)
tris(2-ethylhexyl)phosphate	TEHP	CCCCC(CC)COP(=O)(OCC(CC)CCCC)OCC(CC)CCCC	C24H51O4P		434.352	457.342	[M+Na]+	231.8	0.118743	0.0512267	InChI=1S/C24H51O4P/c1-7-13-16-22(10-4)19-26-29(25,27-20-23(11-5)17-14-8-2)28-21-24(12-6)18-15-9-3/h22-24H,7-21H2,1-6H3	GTVWRXDRKAHEAD-UHFFFAOYSA-N	organophosphorus flame retardant (OP)
tris(2-ethylhexyl)phosphate	TEHP	CCCCC(CC)COP(=O)(OCC(CC)CCCC)OCC(CC)CCCC	C24H51O4P		434.352	869.712	[2M+H]+	315.914	0.469606	0.14865	InChI=1S/C24H51O4P/c1-7-13-16-22(10-4)19-26-29(25,27-20-23(11-5)17-14-8-2)28-21-24(12-6)18-15-9-3/h22-24H,7-21H2,1-6H3	GTVWRXDRKAHEAD-UHFFFAOYSA-N	organophosphorus flame retardant (OP)
tris(2-ethylhexyl)phosphate	TEHP	CCCCC(CC)COP(=O)(OCC(CC)CCCC)OCC(CC)CCCC	C24H51O4P		434.352	891.694	[2M+Na]+	327.648	0.191494	0.0584451	InChI=1S/C24H51O4P/c1-7-13-16-22(10-4)19-26-29(25,27-20-23(11-5)17-14-8-2)28-21-24(12-6)18-15-9-3/h22-24H,7-21H2,1-6H3	GTVWRXDRKAHEAD-UHFFFAOYSA-N	organophosphorus flame retardant (OP)
Tris(2-ethylhexyl)trimellitate	TOTM	CCCCC(CC)COC(=O)C1=CC(=C(C=C1)C(=O)OCC(CC)CCCC)C(=O)OCC(CC)CCCC	C33H54O6		546.392	569.381	[M+Na]+	264.412	0.392772	0.148546	InChI=1S/C33H54O6/c1-7-13-16-25(10-4)22-37-31(34)28-19-20-29(32(35)38-23-26(11-5)17-14-8-2)30(21-28)33(36)39-24-27(12-6)18-15-9-3/h19-21,25-27H,7-18,22-24H2,1-6H3	KRADHMIOFJQKEZ-UHFFFAOYSA-N	Plasticizers
tris(tert-butylphenyl) phosphate		CC(C)(C)C1=CC=CC=C1OP(=O)(OC2=CC=CC=C2C(C)(C)C)OC3=CC=CC=C3C(C)(C)C	C30H39O4P		494.259	495.266	[M+H]+	237.138	0.169912	0.071651	InChI=1S/C30H39O4P/c1-28(2,3)22-16-10-13-19-25(22)32-35(31,33-26-20-14-11-17-23(26)29(4,5)6)34-27-21-15-12-18-24(27)30(7,8)9/h10-21H,1-9H3	SPUXJWDKFVXXBI-UHFFFAOYSA-N	organophosphorus flame retardant (OP)
tris(tert-butylphenyl) phosphate		CC(C)(C)C1=CC=CC=C1OP(=O)(OC2=CC=CC=C2C(C)(C)C)OC3=CC=CC=C3C(C)(C)C	C30H39O4P		494.259	517.248	[M+Na]+	243.948	0.0978264	0.0401013	InChI=1S/C30H39O4P/c1-28(2,3)22-16-10-13-19-25(22)32-35(31,33-26-20-14-11-17-23(26)29(4,5)6)34-27-21-15-12-18-24(27)30(7,8)9/h10-21H,1-9H3	SPUXJWDKFVXXBI-UHFFFAOYSA-N	organophosphorus flame retardant (OP)
